# Supplementary material for: Implementing vanadium peroxides as direct air carbon capture materials
Source: Royal Society of Chemistry journal article supplement (doi:10.1039/d3sc05381d), 2023-12-21
Supplement: d3sc05381d1.pdf [file d3sc05381d1.pdf]

## Supporting Information

### Implementing Vanadium Peroxides as Direct Air Carbon Capture Materials

*Eduard Garrido Ribó,<sup>‡,a</sup> Zhiwei Mao,<sup>‡,a</sup> Jacob S. Hirschi,<sup>a</sup> Taylor Lindsay,<sup>a</sup> Karlie Bach,<sup>a</sup> Eric D. Walter,<sup>b</sup> Casey R. Simons,<sup>c</sup> Tim J. Zuehlsdorff,<sup>a</sup> May Nyman<sup>\*,a</sup>*

<sup>a</sup>Department of Chemistry, Oregon State University, Corvallis, OR 97331 United States.

<sup>b</sup>Pacific Northwest National Laboratory, Environmental Molecular Sciences Laboratory, Pacific Northwest National Laboratory, Richland, WA 99352

<sup>c</sup>CAMCOR, University of Oregon, Eugene, OR 97331 United States.

Department of Chemistry, Oregon State University, OR 97330, United States

## Table of Contents

|                                                                                                                                |    |
|--------------------------------------------------------------------------------------------------------------------------------|----|
| <b>Materials and Instrumentation</b> .....                                                                                     | 3  |
| <b>Elemental Analysis</b> .....                                                                                                | 3  |
| <b>FT-IR Spectroscopy</b> .....                                                                                                | 3  |
| <b>UV-vis Spectroscopy</b> .....                                                                                               | 3  |
| <b>Single Crystal X-Ray Diffraction</b> .....                                                                                  | 3  |
| <b>Thermogravimetric Analysis – Mass Spectroscopy (TGA-MS)</b> .....                                                           | 3  |
| <b>Computational Details</b> .....                                                                                             | 3  |
| <b>Solid-State</b> .....                                                                                                       | 3  |
| <b>Cluster-Model</b> .....                                                                                                     | 4  |
| <b>Synthetic Procedure for Tetraperoxovanadates</b> .....                                                                      | 5  |
| <b>Potassium Tetraperoxovanadate, <math>K_3V(O_2)_4</math></b> .....                                                           | 5  |
| <b>Rubidium Tetraperoxovanadate, <math>Rb_3V(O_2)_4</math></b> .....                                                           | 5  |
| <b>Cesium Tetraperoxovanadate, <math>Cs_3V(O_2)_4</math></b> .....                                                             | 5  |
| <b>Potassium oxodiperoxocarbonate, <math>K_3VO(O_2)_2CO_3</math></b> .....                                                     | 6  |
| <b>NBT Tests</b> .....                                                                                                         | 6  |
| <b>Alkali hydroxide tests</b> .....                                                                                            | 6  |
| <b>Tetraperoxovanadates tests</b> .....                                                                                        | 6  |
| <b>KO<sub>2</sub> Calibration Curve</b> .....                                                                                  | 6  |
| <b>EPR Measurements</b> .....                                                                                                  | 6  |
| <b>Crystallographic data</b> .....                                                                                             | 8  |
| <b>Crystallographic Images</b> .....                                                                                           | 9  |
| <b>Bulk Characterization of compounds <math>K_3V(O_2)_4</math>, <math>Rb_3V(O_2)_4</math>, <math>Cs_3V(O_2)_4</math></b> ..... | 11 |

|                                                                                                            |    |
|------------------------------------------------------------------------------------------------------------|----|
| <b>PXRD following the CO<sub>2</sub> capture process</b> .....                                             | 12 |
| <b>Color change</b> .....                                                                                  | 13 |
| <b>FT-IR Spectra</b> .....                                                                                 | 14 |
| <b>Solid State NMR</b> .....                                                                               | 16 |
| <b>Computational mechanisms</b> .....                                                                      | 17 |
| <b>K<sub>3</sub>VO<sub>5</sub>CO<sub>3</sub> and KVO<sub>3</sub>/KHCO<sub>3</sub> reference data</b> ..... | 20 |
| <b>TGA-MS data and Curves</b> .....                                                                        | 22 |
| <b>CHN Analysis</b> .....                                                                                  | 31 |
| <b>Superoxide Characterization</b> .....                                                                   | 36 |
| <b>NBT Tests</b> .....                                                                                     | 36 |
| <b>EPR Characterization</b> .....                                                                          | 40 |
| <b>Exploring superoxide through computation.</b> .....                                                     | 42 |
| <b>Carbon Capture technologies overview</b> .....                                                          | 44 |
| <b>References</b> .....                                                                                    | 49 |

## Materials and Instrumentation

### Elemental Analysis

The content of carbon was characterized using NC2500 ThermoQuest Elemental Analyzer fitted with a Costech Zero Blank Autosampler and ECS 4010 CHNSO Analyzer fitted with at Costech Zero Blank Autosampler, which belong to the Ocean Ecology and Biogeochemistry Facilities in the Oregon State University. The contents of K, Rb, and V were determined using a Horiba inductivity-coupled plasma (ICP) spectroscopy.

### FT-IR Spectroscopy

The FT-IR spectra were collected using PerkinElmer Spectrum Two spectrometer in the range of 500 - 4000  $\text{cm}^{-1}$ . Wavenumbers are given in  $\text{cm}^{-1}$  and intensities are demonstrated as s = strong, m = medium, w = weak, vs= very strong, br = broad, sh = sharp.

### UV-vis Spectroscopy

The UV-vis absorbance spectra were obtained using a PerkinElmer Lambda 1050+ UV-Vis/NIR Spectrometer.

### Single Crystal X-Ray Diffraction

Single-crystal X-ray diffraction for all structures were collected at 150 K, on a Rigaku Oxford Diffraction Synergy-S equipped with a PhototJet-S Cu source ( $\lambda = 1.54178 \text{ \AA}$ ) and a HyPix-6000HE photon counting detector. All images were collected and processed using CrysAlisPro Versions 40.21a, 40.53, and 40.81a (Rigaku Oxford Diffraction, 2018). Data collection, data reduction, cell refinement, and experimental absorption correction were performed with the Bruker Apex2 software package. All calculations were performed using the SHELX program package with Olex2.

### Thermogravimetric Analysis – Mass Spectroscopy (TGA-MS)

Thermogravimetric analysis (TGA) was performed on TA Instruments SDT Q600 and Mass Spectrometry (MS) was collected by Hiden Gas Analyzer HPR-20 QIC EGA. About 10 mg of the sample was transferred into alumina crucibles for measurements under Argon gas flow (the purge flow is 100 ml/min) up to 900 °C at the heating rate of 10 °C per minute.

### Computational Details

#### Solid-State

For the solid-state simulations, DFT<sup>1,2</sup> unit-cell optimizations were carried out in CASTEP 20.11<sup>3</sup> with the GGA functional PBE<sup>4</sup> and BFGS<sup>5</sup> algorithm. A 850 eV kinetic energy cutoff and 2x2x2 k-grid<sup>6</sup> were

demonstrated to be adequate with CASTEP's on-the-fly generated norm-conserving pseudopotentials in convergence tests on  $K_3VO(O_2)_2CO_3$ . Phonon calculations at the gamma point were performed with the optimized structures through the density-functional perturbation theory (DFPT) method.<sup>7</sup>

Experimental crystal structures of  $K_3V(O_2)_4$  and  $K_3VO(O_2)_2CO_3$  were taken as starting geometries for the optimizations. The lowest energy structures from the Materials Project<sup>8</sup> were taken for the remaining solid compounds. Vectors corresponding to the atomic displacements associated with the normal modes of vibration were made using jmol.<sup>9</sup>

Thermodynamic changes presented in the manuscript as solid-state were generated exclusively using CASTEP, except for the free energy thermal corrections for  $O_2$  and  $CO_2$ , which were taken from gas-phase calculations in Gaussian (details provided below). The reaction free energies for

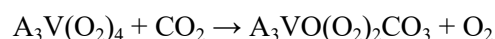

(where A = K, Rb, or Cs) were calculated assuming idealized K-based structures, i.e. not using the experimentally based unit cells for Rb or Cs. The relative crystal stability of the vanadate reactants in said reaction were calculated based on the following scheme:

$$E_{rel. stab.} = E_{A_3V(O_2)_4} - 3E_{A^+}$$

where each energy value represents an electronic self-consistent field energy. The  $E_{A^+}$  value was obtained by placing the positively charged alkali ion in a periodic box of 35 x 35 x 35 Angstroms. An analogous approach was also used for the products.

### Cluster-Model

To model the reaction mechanism, gas phase DFT geometry optimizations were performed in Gaussian 16 Rev. A.03<sup>10</sup> with the range-separated hybrid functional CAM-B3LYP<sup>11</sup> with a 6-31+G\* basis set for all atoms except the alkali counterions and Nb/Ta metal centers which were modeled with the LanL2DZ<sup>12</sup> effective core potential generated from the gaussian library. All minima and transition states were verified to have exclusively real frequencies and one imaginary frequency, respectively.

Inaccuracies of computed vibrational frequencies is likely an issue with the physical model/structure used for the calculation, and not a limitation of the computational method. From previous benchmarking studies, a typical error of 40  $cm^{-1}$  can be expected for DFT vibrational energies with CAM-B3LYP/6-31+G\*/LANL2DZ.<sup>13</sup> Our computed frequencies are up to 92  $cm^{-1}$  off from experiment, and could be due to the lack of inclusion of solvent effects from embedded water or hydrogen peroxide in these simulated

crystal structures. Despite this discrepancy, these energies are still broadly consistent with carbonate C=O vibrations, see for example figure 5 in reference.<sup>14</sup>

All structures are provided on this GitHub repository: [https://github.com/tjz21/DAC\\_peroxovanadates](https://github.com/tjz21/DAC_peroxovanadates)

### Synthetic Procedure for Tetraperoxovanadates

#### Potassium Tetraperoxovanadate, $\text{K}_3\text{V}(\text{O}_2)_4$

$\text{V}_2\text{O}_5$  (0.181 g, 1.0 mmol) was dissolved in 4M KOH (2.5 ml, 10.0 mmol), and then 30wt%  $\text{H}_2\text{O}_2$  (2.05 ml, 20.1 mmol) was added to the mixture with stirring under the ice bath (0 – 5 °C). The solution turned clear purple and was then transferred to a 100 ml beaker with excess precooled ethanol (about 25 ml). Maintaining the stirring for approximately 15 minutes, the purple  $\text{K}_3\text{V}(\text{O}_2)_4$  precipitated. After that, stirring was stopped, most of the ethanol was removed, and the slurry was refilled with methanol while in the ice bath. The final product was separated by vacuum filtration and washed with cold methanol to remove the impurities. **Yield:** 0.511 g (86.7 %, based on V).

Suitable single crystals were obtained by mixing the clear purple solution with cold ethanol in a 20 ml scintillation vial and maintained at 0 °C without stirring. Deep purple crystals appeared overnight.

#### Rubidium Tetraperoxovanadate, $\text{Rb}_3\text{V}(\text{O}_2)_4$

$\text{V}_2\text{O}_5$  (0.181 g, 1.0 mmol) was dissolved in 4M RbOH (2.5 ml, 10.0 mmol), and then 30wt%  $\text{H}_2\text{O}_2$  (2.05 ml, 20.1 mmol) was added to the mixture with stirring under the ice bath (0 – 5 °C). The solution turned purple with some unreacted  $\text{V}_2\text{O}_5$  at the bottom. Only the upper clear purple solution was transferred to a 100 ml beaker with excess precooled ethanol (about 25 ml). Maintaining the stirring for approximately 20 minutes, the purple  $\text{Rb}_3\text{V}(\text{O}_2)_4$  precipitated. After that, stirring was stopped, most of the ethanol was removed, and the slurry was refilled with methanol while in the ice bath. The final product was separated by vacuum filtration and washed with cold methanol to remove the impurities. **Yield:** 0.836 g (96.5 %, based on V).

Suitable single crystals were obtained by transferring a small portion of the upper clear purple solution into a 5 ml vial which was stored in sealed a 20 ml scintillation vial containing ethanol. Slow vapor diffusion in the refrigerator at 5°C produced deep purple crystals of compound **2** overnight.

#### Cesium Tetraperoxovanadate, $\text{Cs}_3\text{V}(\text{O}_2)_4$

Compound **3** was synthesized by following the same procedure as compound **1** with the difference of using 4M CsOH (2.5 ml, 10.0 mmol) instead of 4M KOH. **Yield:** 0.947 g (82.3 %, based on V). Since the Cs-analogue is more reactive, the operations were performed as quickly as possible.

Suitable single crystals were obtained by transferring a small portion of the upper clear purple solution into a 5 ml vial which was stored in sealed a 20 ml scintillation vial containing ethanol. Before sealing both vials, Ar gas was used to flush the solution in the small vial and the ethanol in the large vial for 5 minutes. Slow vapor diffusion in the refrigerator at 5°C produced deep purple crystals overnight.

### **Potassium oxodiperoxocarbonate, $K_3VO(O_2)_2CO_3$**

Synthesis of  $K_3VO(O_2)_2CO_3$  was adapted from literature.<sup>15</sup> Briefly,  $V_2O_5$  (0.23 g, 1.2 mmol) and  $K_2CO_3$  (10 g, 72.4 mmol) were suspended in 1.5 wt%  $H_2O_2$  (50ml, 22 mmol) with stirring. Once the solids were dissolved, the sample was placed in an open beaker and kept at 5 °C undisturbed. Yellow crystals appeared within one week.

### **NBT Tests**

#### **Alkali hydroxide tests.**

These tests were adapted from previous work performed on aqueous mixtures of sodium hydroxide, hydrogen peroxide and NBT.<sup>16</sup> 1.25 mL of a 0.05 M solution of KOH was mixed with 4 mL of a 0.6 mM solution of NBT. Then, 29  $\mu$ L of 15 %  $H_2O_2$  were added, causing a colour change from pale yellow to purple. This solution was monitored over time as the solution darkened progressively. After long periods of time standing, the insoluble NBT-formazan product precipitates.

#### **Tetraperoxovanadates tests**

5.25 mL of 0.46 mM NBT solution were added to 0.065 mmol of tetraperoxovanadate (18.7 mg for the K-analogue, 32.5 mg for the Rb-analogue and 39.5 mg for the Cs-analogue). These masses were used for both fresh and decomposed tests. The solid dissolved rapidly and the solution was monitored over time, starting when the purple colour of vanadium-bound peroxide disappeared. Both linear and power law fits of the curves were attempted, in order to extrapolate the data to time=0. These are summarized in **Table S10**.

#### **KO<sub>2</sub> Calibration Curve**

A stock solution was prepared by adding 50 mL of 0.7 mM NBT solution into a glass vial containing 5.2 mg of  $KO_2$ , giving a final concentration of 1.46 mM of  $KO_2$ . The solid dissolved quickly and produced a purple solution. A set of standards were created by diluting the stock solution to the following concentrations: 0.91 mM, 0.73 mM, 0.55 mM, 0.37 mM and 0.29 mM.

### **EPR Measurements**

EPR spectra were recorded with a Bruker ELEXSYS E580 spectrometer equipped with a SHQE resonator. The typical settings for the spectra were microwave frequency = 9.32 GHz, sweep width = 3000 G, sweep time = 82 s, power = 20.0 mW, field modulation amplitude = 5.0 G. Samples were contained in 4mm OD FEP tubes (Wilmad). Temperature-dependent spectra were acquired using a Bruker continuous flow nitrogen cryostat and BVT 3000 controller.

To quantify the superoxide in the peroxovanadates, we also performed an EPR measurement on a 1000 ppm standard solution of copper imidazolate, and the area under the curve translates to number of spins as a reference for the superoxide signals from the peroxovanadate compounds (predetermined weights). From the formula weights of these compounds, based on both crystal structure and TGA weight loss data, we determined the mole percent of superoxide present; assuming the following charge-balance replacement:

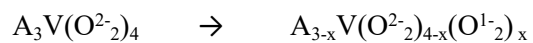

These results are summarized in **Table S11**.

## Crystallographic data

**Table S1.** Crystallographic data

| Compound                                     | <b>2</b>                                   | <b>3</b>                                       |
|----------------------------------------------|--------------------------------------------|------------------------------------------------|
| CCDC                                         | 2264013                                    | 2264012                                        |
| Formula                                      | O <sub>13</sub> Rb <sub>3</sub> V          | Cs <sub>3</sub> O <sub>11</sub> V              |
| Crystal system                               | Monoclinic                                 | Monoclinic                                     |
| Temperature (K)                              | 229.99(10)                                 | 149.99(10)                                     |
| Space group                                  | P2 <sub>1</sub> /n                         | P2 <sub>1</sub> /n                             |
| a (Å)                                        | 6.8447(2)                                  | 8.4013(3)                                      |
| b(Å)                                         | 23.2894(5)                                 | 12.0178(4)                                     |
| c (Å)                                        | 7.8276(2)                                  | 11.5178(5)                                     |
| β°                                           | 112.399(3)                                 | 91.359(4)                                      |
| Volume (Å <sup>3</sup> )                     | 1153.65(6)                                 | 1162.57(8)                                     |
| Z                                            | 4                                          | 4                                              |
| Density (calculated) (g/cm <sup>3</sup> )    | 2.967                                      | 3.575                                          |
| Absorption coefficient (mm <sup>-1</sup> )   | 23.179                                     | 10.149                                         |
| Radiation                                    | Cu Kα (λ = 1.54184)                        | Mo Kα (λ = 0.71073)                            |
| Index ranges                                 | -8 ≤ h ≤ 8,<br>-29 ≤ k ≤ 29,<br>-9 ≤ l ≤ 9 | -11 ≤ h ≤ 12,<br>-17 ≤ k ≤ 13,<br>-13 ≤ l ≤ 16 |
| Reflections collected                        | 12272                                      | 11316                                          |
| Independent reflections                      | 2365 [Rint = 0.0969,<br>Rsigma = 0.0502]   | 3429 [Rint = 0.0503,<br>Rsigma = 0.0447]       |
| Goodness-of-fit on F2                        | 1.117                                      | 1.018                                          |
| Final R indices [I>2σ(I)]                    | R1 = 0.0583, wR2 =<br>0.1638               | R1 = 0.0320, wR2 =<br>0.0816                   |
| R indices (all data)                         | R1 = 0.0583, wR2 =<br>0.1638               | R1 = 0.0419, wR2 =<br>0.0853                   |
| Largest diff. peak/hole (e Å <sup>-3</sup> ) | 1.54/-0.88                                 | 1.92/-1.29                                     |



## Crystallographic Images

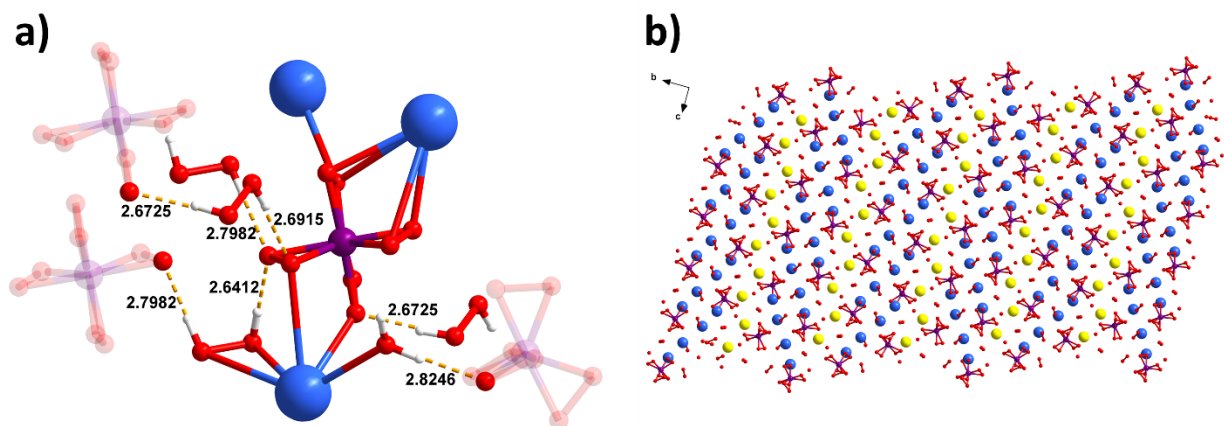

**Figure S1.** a) Ball and stick representation of compound **2** and its surrounding environment. The distances between the solvent molecules and the different peroxide ligands bound to the central vanadium atom are marked as discontinuous orange bonds. Their average distance of 2.7 Å indicates H-bonding, further confirming the fact that the free peroxide ligands are indeed protonated. In this depiction, hydrogen atoms were included for clarity, however, these were not found by x-ray diffraction. b) Extended crystal packing of compound **2** seen from the *a*-axis. It can be seen how the Rb cations arrange in a zigzag pattern along the *bc* plane, with Rb1 and Rb3 arranged in series of 4 and Rb2 creating a node in between. Rb2 are colored yellow for clarity. V: violet. Rb: dark blue. O: red. H: white

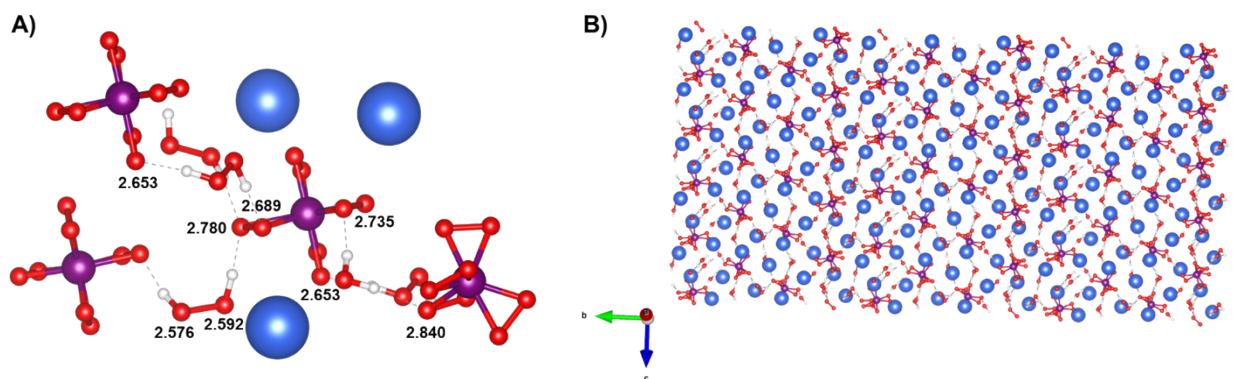

**Figure S2.** Segment of the computationally predicted unit cell for  $\text{Rb}_3\text{V}(\text{O}_2)_4(\text{H}_2\text{O})_1(\text{H}_2\text{O}_2)_2$  with selected O-O distances displayed in angstroms. This structure was generated by explicitly adding hydrogens to the experimental crystal geometry, which was then optimized using DFT. (b) A supercell arrangement of the same structure viewed along the *c*-axis.

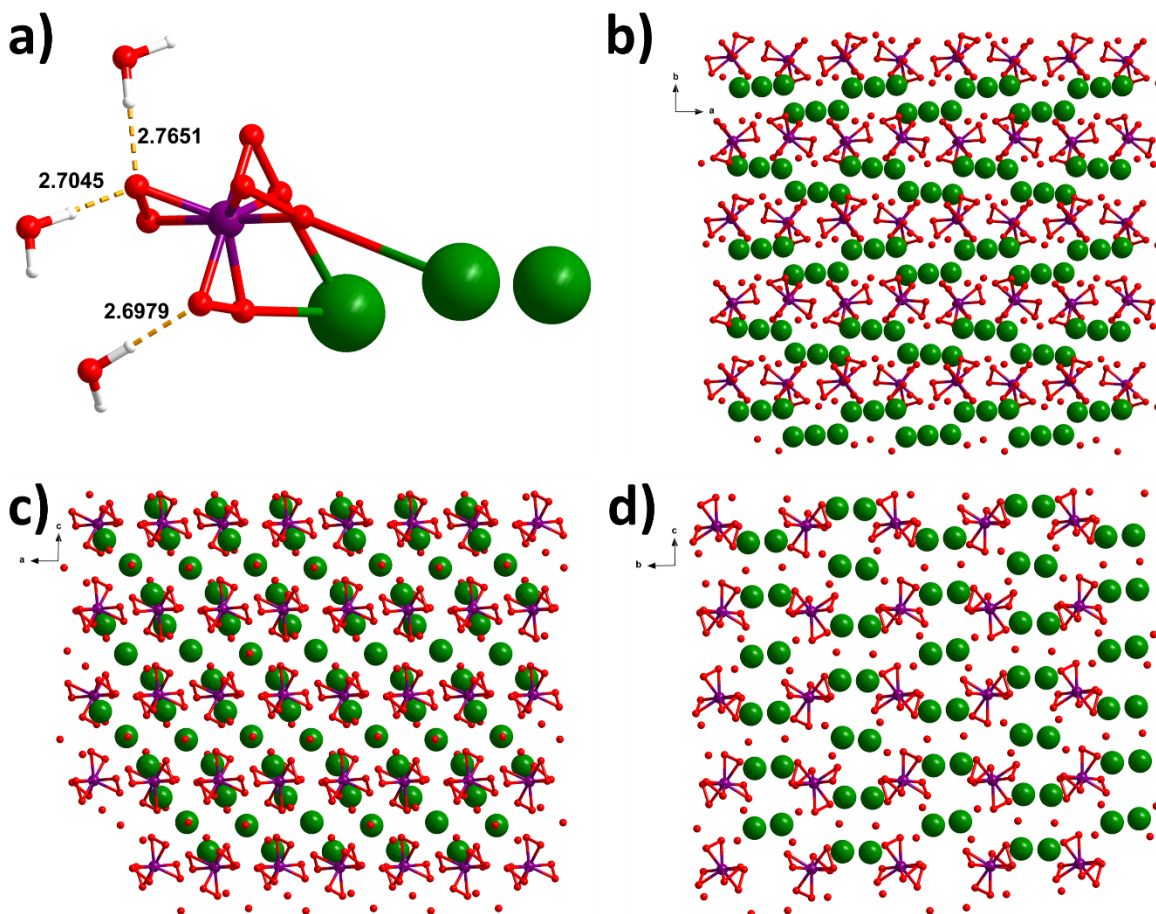

**Figure S3.** a) Ball and stick representation of compound **3** and its surrounding environment. The distances between the solvent molecules and the different peroxide ligands bound to the central vanadium atom are marked as discontinuous orange bonds. Their average distance of 2.7 Å indicates H-bonding. In this depiction, hydrogen atoms were included for clarity, however, these were not found by x-ray diffraction. b) Extended crystal packing of compound **3** seen from the c-axis. c) Extended crystal packing of compound **3** seen from the b-axis. d) Extended crystal packing of compound **3** seen from the a-axis. V: violet. Cs: green. O: red.

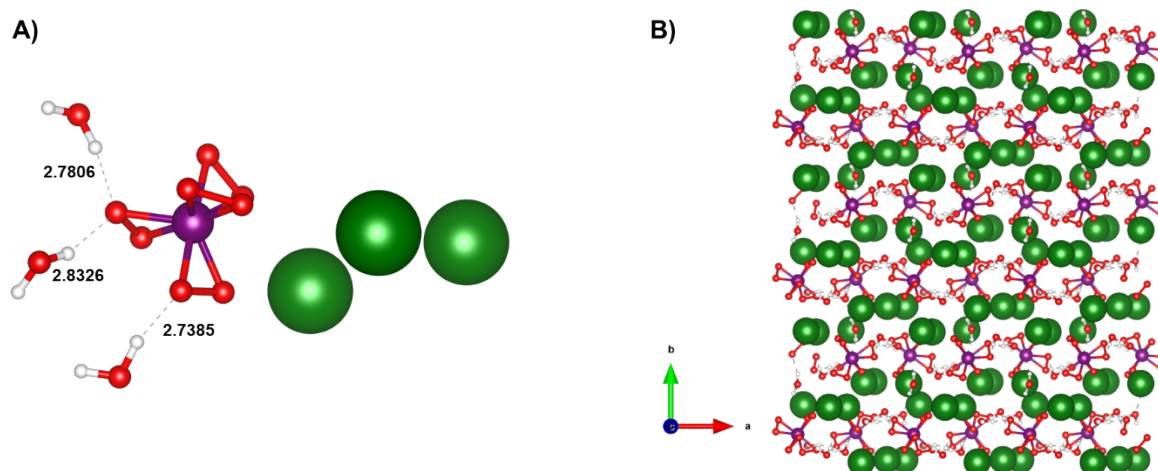

**Figure S4.** Segment of the DFT-optimized unit cell of  $\text{Cs}_3\text{V}(\text{O}_2)_4(\text{H}_2\text{O})_3$  with selected O-O distances displayed in angstroms. (b) The same structure viewed along the c-axis.

### Bulk Characterization of compounds $\text{K}_3\text{V}(\text{O}_2)_4$ , $\text{Rb}_3\text{V}(\text{O}_2)_4$ , $\text{Cs}_3\text{V}(\text{O}_2)_4$

**Table S2.** Summary of TGA results

| Compound        | TGA weight loss (experimental) | Theoretical weight loss assuming no extra-framework molecules <sup>1</sup> | Maximum wt % extraframework molecules |
|-----------------|--------------------------------|----------------------------------------------------------------------------|---------------------------------------|
| 1 (K analogue)  | 22.0%                          | 21.6%                                                                      | N/A                                   |
| 2 (Rb analogue) | 16.6%                          | 14.7%                                                                      | ~2% <sup>2</sup>                      |
| 3 (Cs analogue) | 11.3%                          | 11.1%                                                                      | N/A                                   |

<sup>1</sup>calculated by the reaction  $\text{A}_3\text{VO}_8 \rightarrow \Delta \rightarrow \text{A}_3\text{VO}_4 + 2\text{O}_2$

<sup>2</sup> ~2% mass is the equivalent of 8.9 mass units, or approximately half a water molecule or a fourth of a peroxide molecule

## PXRD following the CO<sub>2</sub> capture process

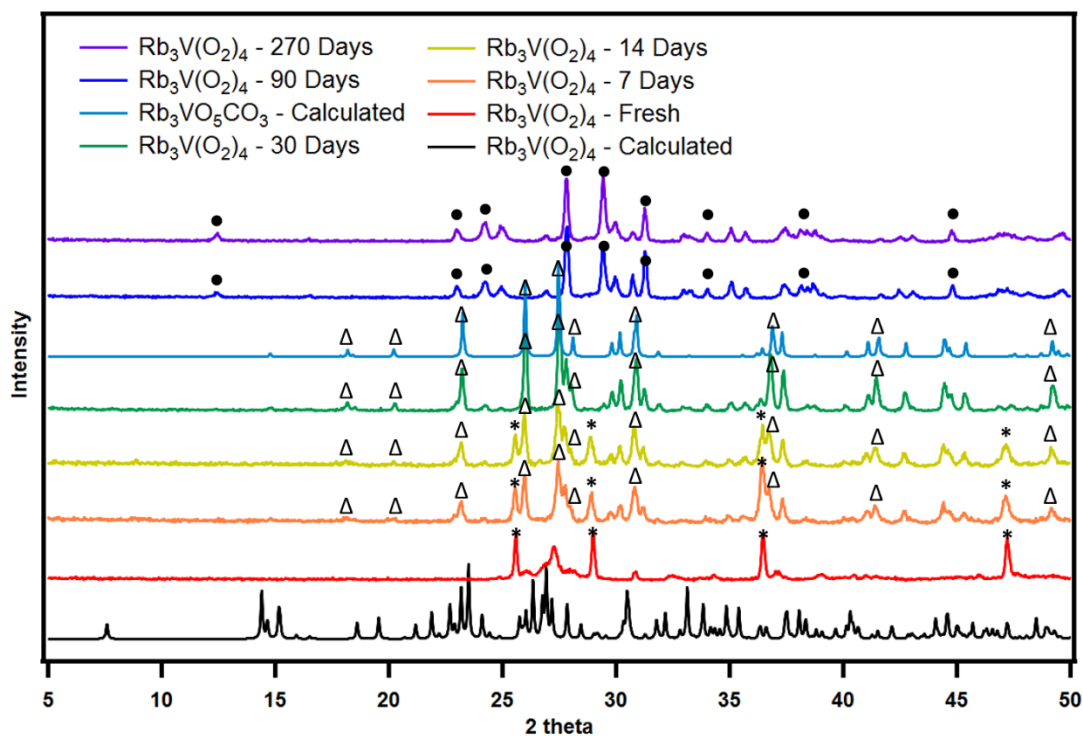

**Figure S5.** PXRD patterns for  $\text{Rb}_3\text{V}(\text{O}_2)_4$  being exposed to the air over time. After 30 days exposure to the air, new peaks (marked with  $\Delta$ ) indicate the formation of  $\text{Rb}_3[\text{VO}(\text{O}_2)_2(\text{CO}_3)]$ , and the result matched with the calculation of  $\text{Rb}_3[\text{VO}(\text{O}_2)_2(\text{CO}_3)]$  single crystal result. When the sample was left over 90 days, extra peaks (marked with •) suggest the structure has changed while the old structure was completely decomposed.

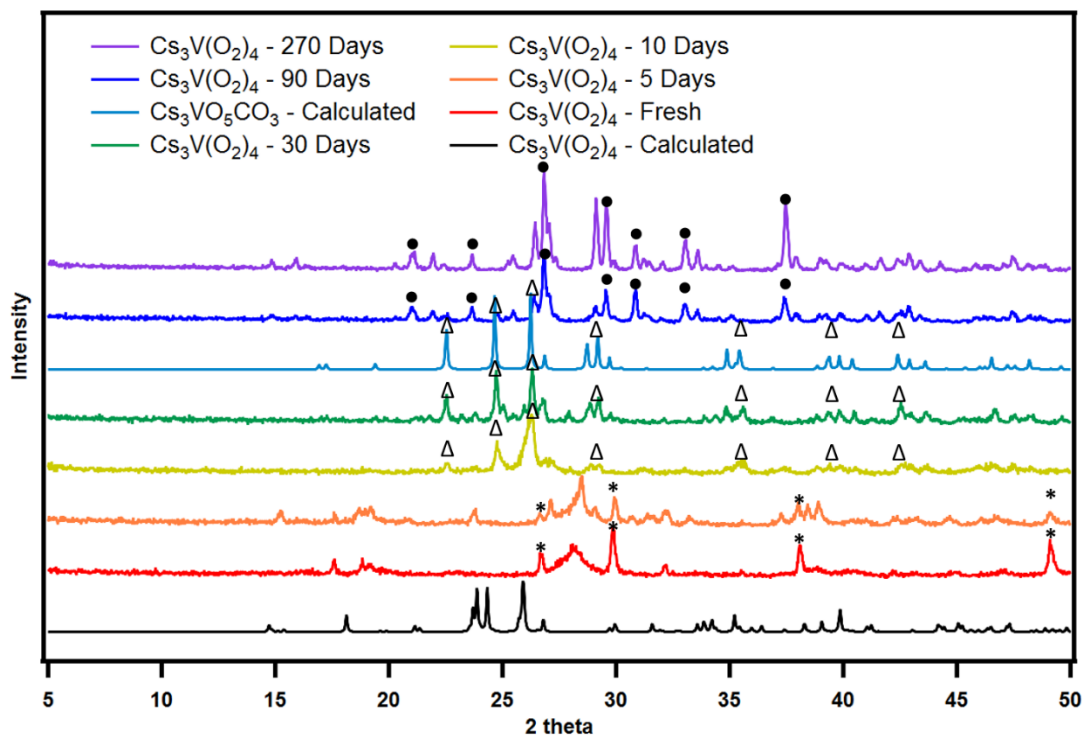

**Figure S6.** PXRD patterns for  $\text{Cs}_3\text{V}(\text{O}_2)_4$  being exposed to the air over time. After 30 days exposure to the air, new peaks (marked with  $\Delta$ ) indicate the formation of  $\text{Cs}_3[\text{VO}(\text{O}_2)_2(\text{CO}_3)]$ , and the result matched with the calculation of  $\text{Cs}_3[\text{VO}(\text{O}_2)_2(\text{CO}_3)]$  single crystal result. When the sample was left over 90 days, extra peaks (marked with  $\bullet$ ) suggest the structure has changed while the old structure was completely decomposed.

#### Color change

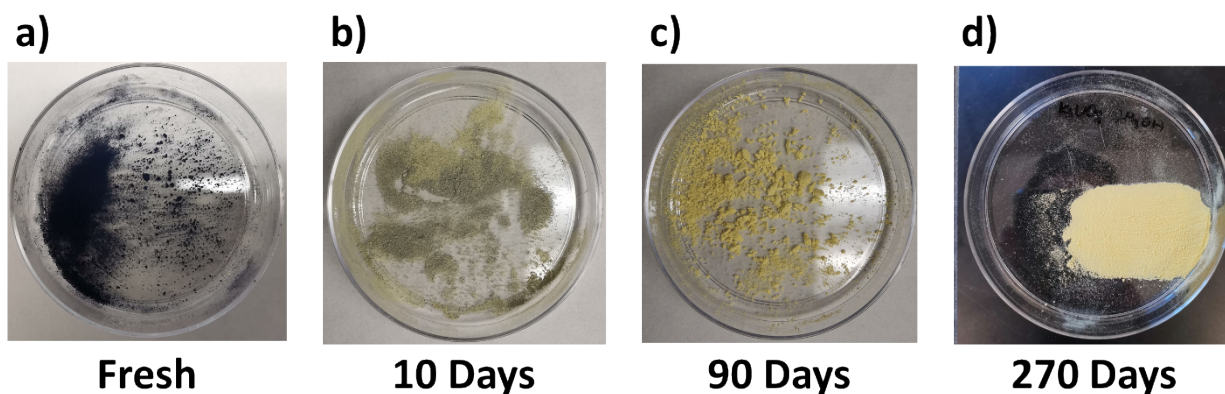

**Figure S7.** Gradual colour change of  $\text{K}_3\text{V}(\text{O}_2)_4$  upon extended exposure to ambient conditions.

## FT-IR Spectra

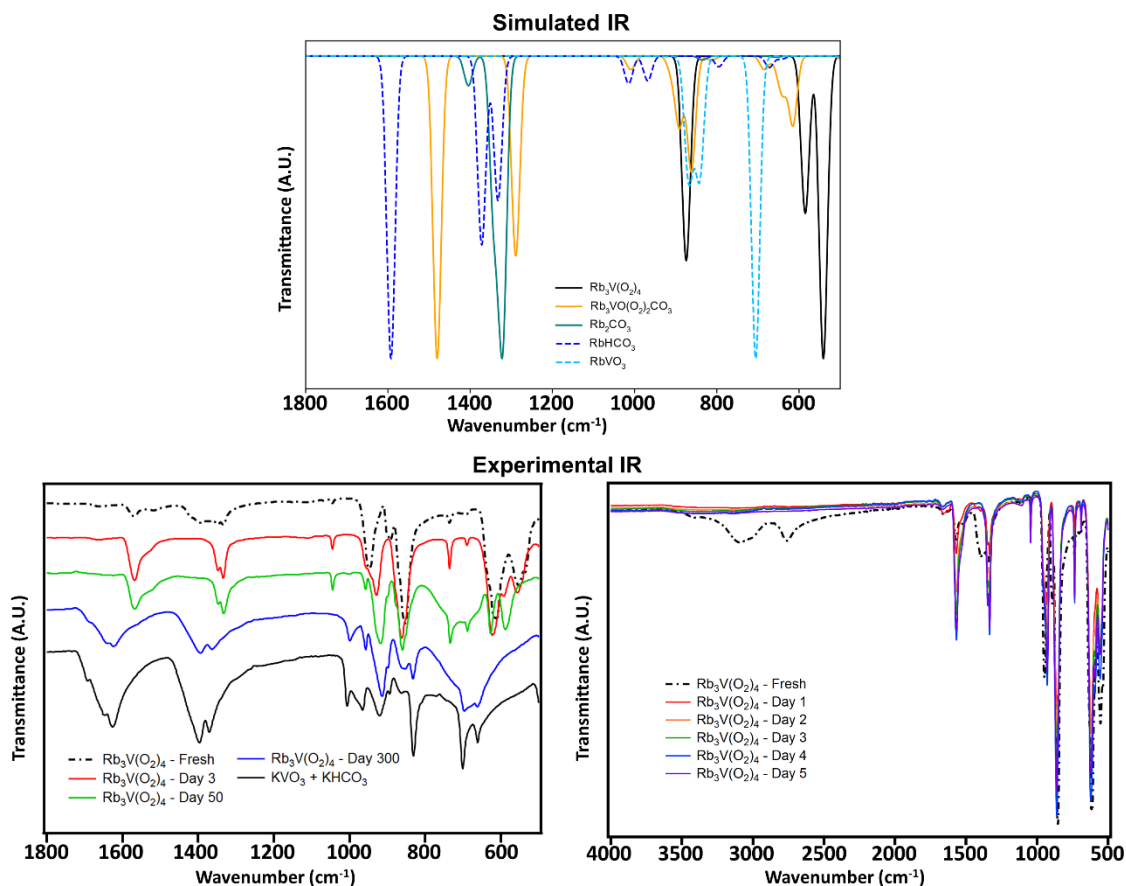

**Figure S8.** FTIR spectra of  $\text{Rb}_3\text{V}(\text{O}_2)_4$  capturing  $\text{CO}_2$  over time in the spectral range between 1800 and 500  $\text{cm}^{-1}$  with comparison to  $\text{KHCO}_3$ , and  $\text{KVO}_3$  (Bottom left). Full spectrum is included (bottom right) showing no peaks beyond 2000  $\text{cm}^{-1}$ . Representative carbonate peaks for  $\text{Rb}_3[\text{VO}(\text{O}_2)_2(\text{CO}_3)]$  (1570  $\text{cm}^{-1}$ , 1335  $\text{cm}^{-1}$ , and 1045  $\text{cm}^{-1}$ ) are observed in Day 3 and Day 30 samples. The spectrum of Day 300 one matches the IR results of  $\text{KHCO}_3$  (1630  $\text{cm}^{-1}$ , 1390  $\text{cm}^{-1}$ , and 1010  $\text{cm}^{-1}$ ) and  $\text{KVO}_3$  (965  $\text{cm}^{-1}$ , and 890  $\text{cm}^{-1}$ ).

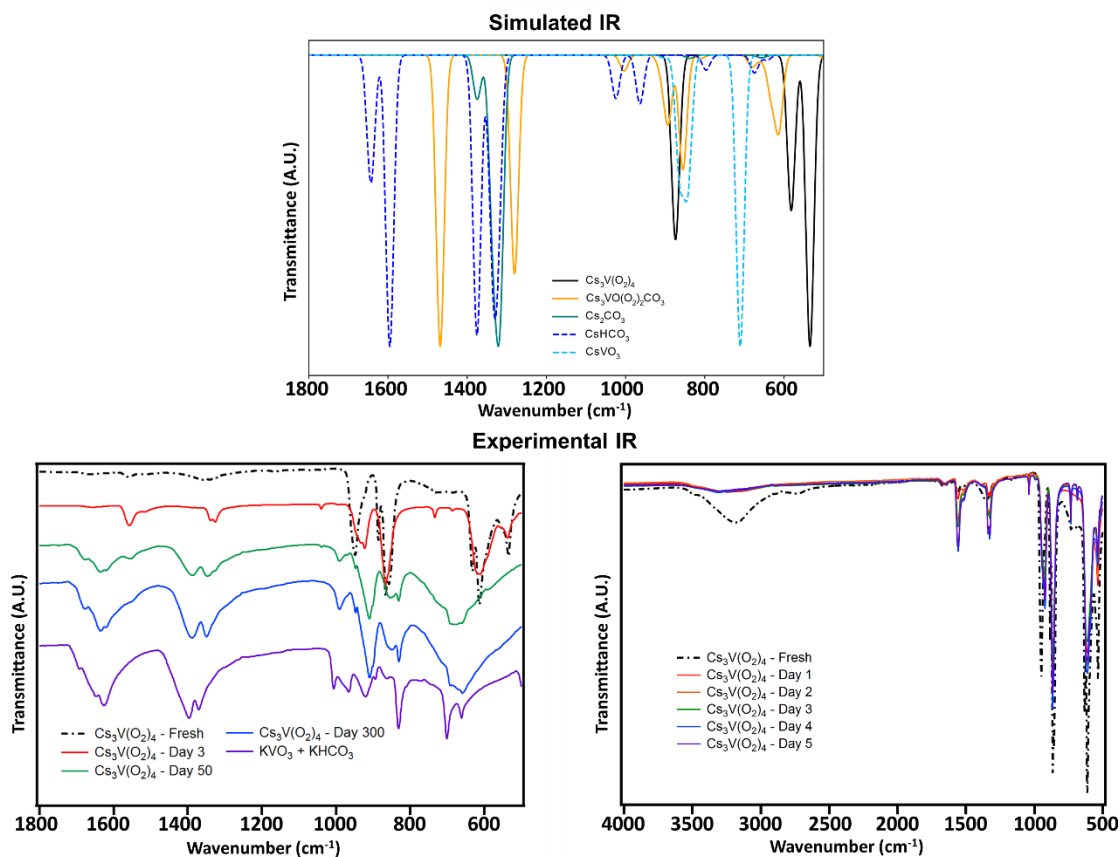

**Figure S9.** FTIR spectra of  $\text{Cs}_3\text{V}(\text{O}_2)_4$  capturing  $\text{CO}_2$  over time in the spectral range between 1800 and 500  $\text{cm}^{-1}$  with comparison to  $\text{KHCO}_3$ , and  $\text{KVO}_3$  (Bottom left). Full spectrum is included (bottom right) showing no peaks beyond 2000  $\text{cm}^{-1}$ . Representative carbonate peaks for  $\text{Cs}_3[\text{VO}(\text{O}_2)_2(\text{CO}_3)]$  (1560  $\text{cm}^{-1}$ , 1330  $\text{cm}^{-1}$ , and 1040  $\text{cm}^{-1}$ ) are observed in Day 3 and Day 30 samples. The spectrum of Day 300 one matches the IR results of  $\text{KHCO}_3$  (1630  $\text{cm}^{-1}$ , 1390  $\text{cm}^{-1}$ , and 1010  $\text{cm}^{-1}$ ) and  $\text{KVO}_3$  (965  $\text{cm}^{-1}$ , and 890  $\text{cm}^{-1}$ ).

**Table S3.** Carbonate FTIR Peak Assignments for  $\text{A}_3\text{V}(\text{O}_2)_4$  after capturing  $\text{CO}_2$  under ambient conditions with the transition to  $\text{A}_3[\text{VO}(\text{O}_2)_2(\text{CO}_3)]$ .

| Material<br>( $\text{A}_3\text{V}(\text{O}_2)_4$ ) | Asymmetric Stretching<br>( $\nu_3$ , $\text{cm}^{-1}$ ) |               | Asymmetric Stretching<br>( $\nu_3'$ , $\text{cm}^{-1}$ ) |               | Symmetric Stretching<br>( $\nu_1$ , $\text{cm}^{-1}$ ) |               |
|----------------------------------------------------|---------------------------------------------------------|---------------|----------------------------------------------------------|---------------|--------------------------------------------------------|---------------|
|                                                    | Experimental                                            | Computational | Experimental                                             | Computational | Experimental                                           | Computational |
| $\text{K}_3[\text{V}(\text{O}_2)_4]$               | 1570                                                    | 1484          | 1340                                                     | 1296          | 1050                                                   | 1014          |
| $\text{Rb}_3[\text{V}(\text{O}_2)_4]$              | 1570                                                    | 1480          | 1335                                                     | 1289          | 1045                                                   | 1009          |
| $\text{Cs}_3[\text{V}(\text{O}_2)_4]$              | 1560                                                    | 1468          | 1330                                                     | 1280          | 1040                                                   | 1004          |

## Solid State NMR

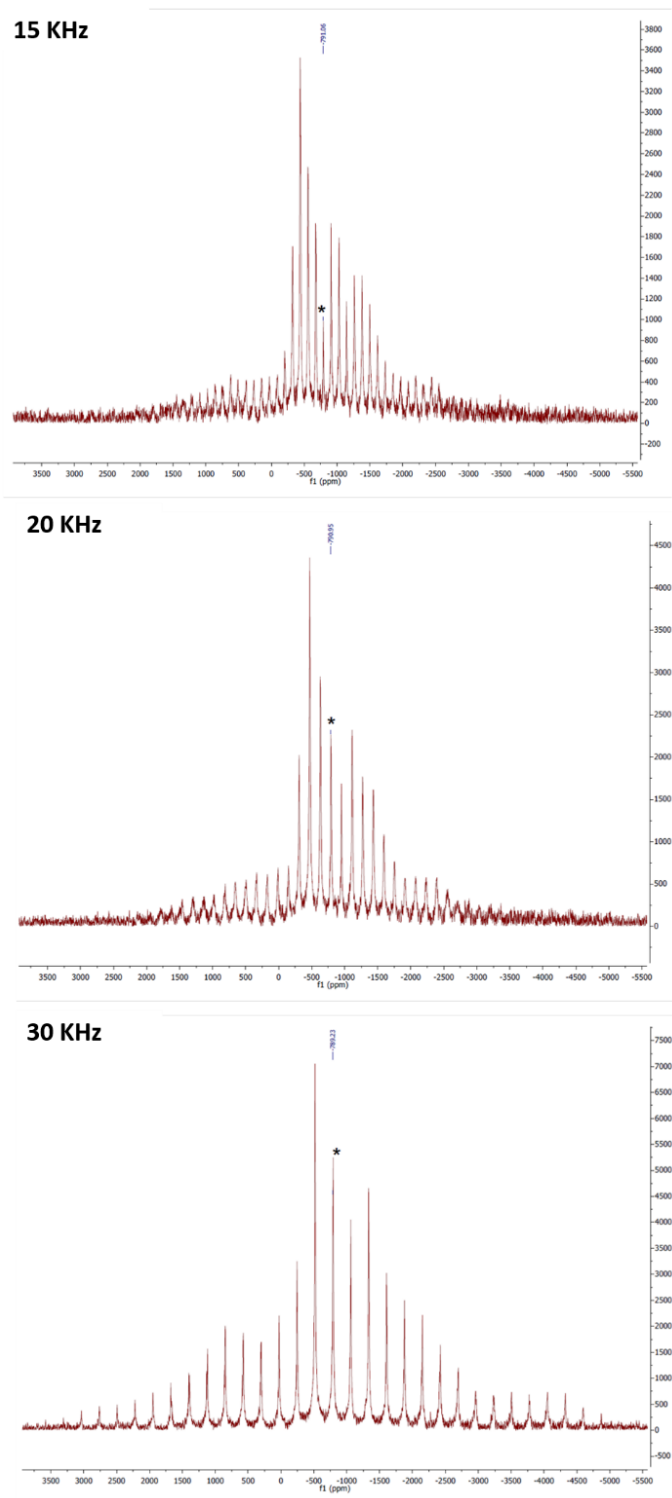

**Figure S10.**  $^{51}\text{V}$  MAS NMR spectra of  $\text{K}_3\text{V}(\text{O}_2)_4$ . The central peak at 789 ppm was determined by changing the spin speeds.



## Computational mechanisms

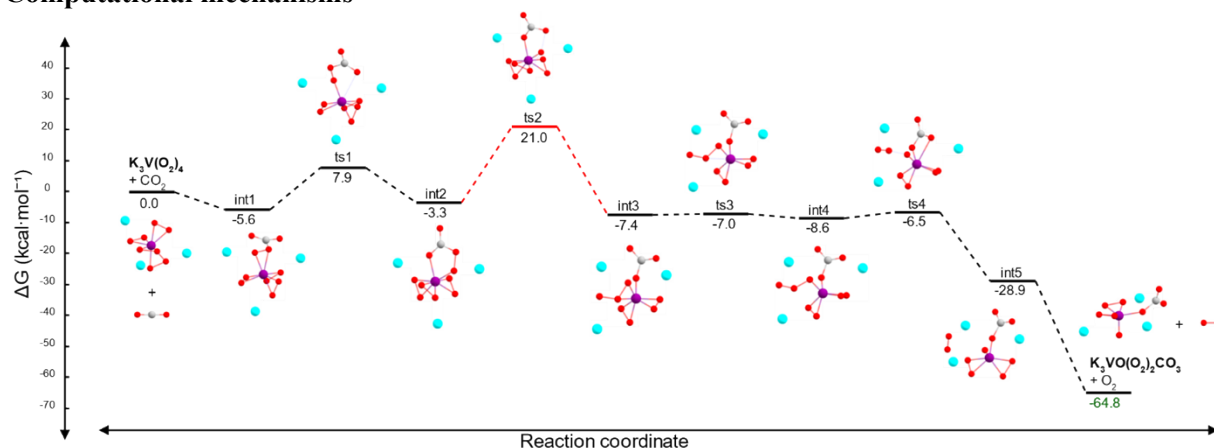

**Figure S11.** A series of five intermediates and four transition states that connect the reactant,  $\text{K}_3\text{V}(\text{O}_2)_4$ , to the  $\text{CO}_2$  addition product,  $\text{K}_3\text{VO}(\text{O}_2)_2\text{CO}_3$ . Of the four steps— $\text{CO}_4$  isomerization, O atom transfer,  $\text{O}_3$  rearrangement, and O-O cleavage—the  $\text{int2} \rightarrow \text{int3}$  O atom transfer highlighted in red is predicted to be the rate-determining.

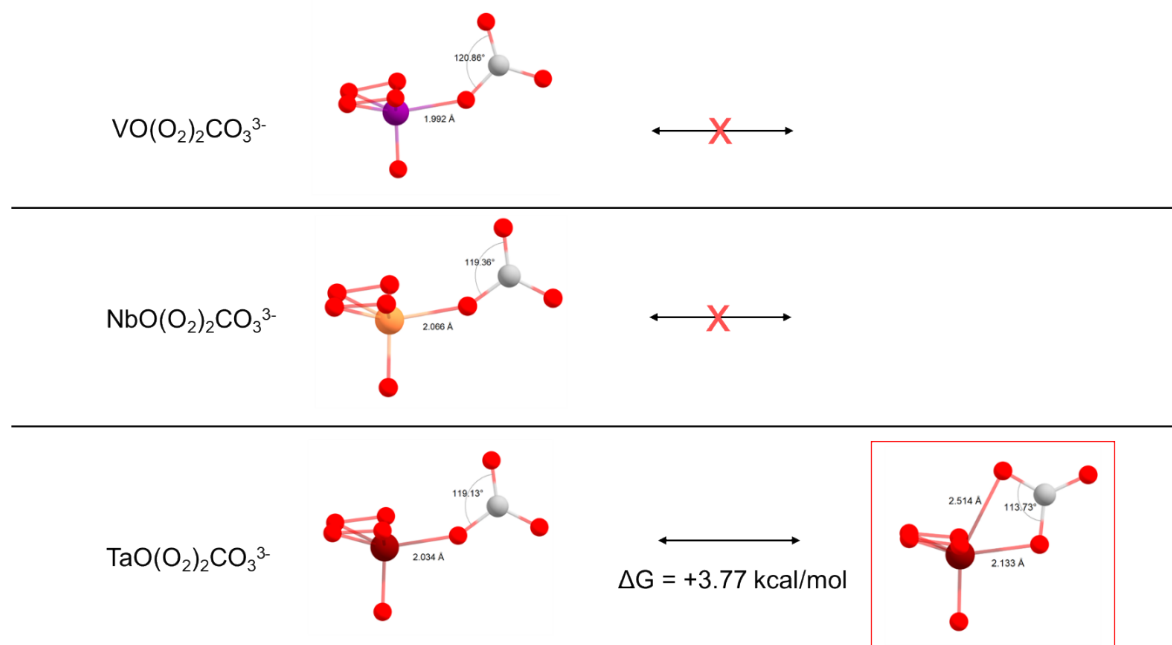

**Figure S12.** Cluster-model DFT calculations of the anionic complexes  $[\text{VO}(\text{O}_2)_2\text{CO}_3]^{3-}$ ,  $[\text{NbO}(\text{O}_2)_2\text{CO}_3]^{3-}$ , and  $[\text{TaO}(\text{O}_2)_2\text{CO}_3]^{3-}$ . The bidentate  $\text{CO}_3$  orientation only becomes kinetically stable with Ta.

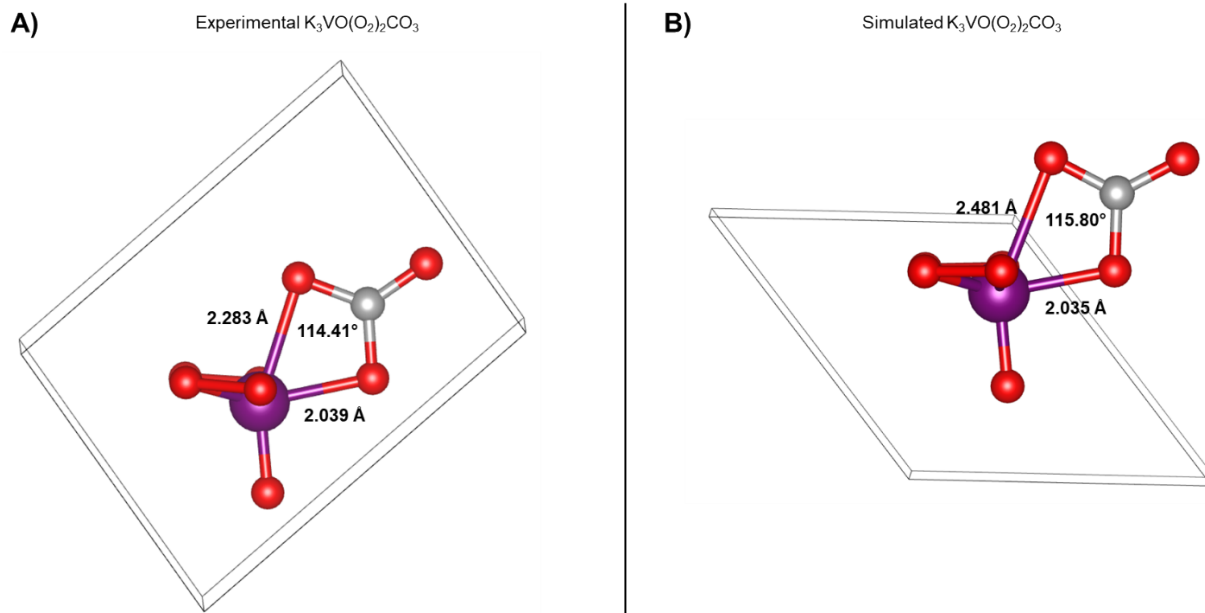

**Figure S13.** (A) Experimental crystal structure of  $\text{K}_3\text{VO}(\text{O}_2)_2\text{CO}_3$  with the potassium counterions removed for clarity. (B) DFT-optimized structure with periodic boundary conditions presented in the same style, which features bidentate coordination of the  $\text{CO}_3$ , albeit with highly asymmetric V-O bond lengths for the coordinating oxygen atoms: 2.481 vs 2.035 Å. This asymmetry is also observed, albeit to a lesser extent, in the experimental crystal structure. Therefore, the chemically suspicious monodentate geometry of  $\text{CO}_3$  in the cluster-model  $\text{K}_3\text{VO}(\text{O}_2)_2\text{CO}_3$  calculations is attributed to (1) the small atomic radius of the  $\text{V}^{5+}$  metal center and (2) the lack of crystal packing effects. The  $\kappa^1$ - $\text{CO}_3$  geometry of the product is not expected to impact the  $\text{int2} \rightarrow \text{int3}$  (Figure S49) rate-determining step of the mechanism.

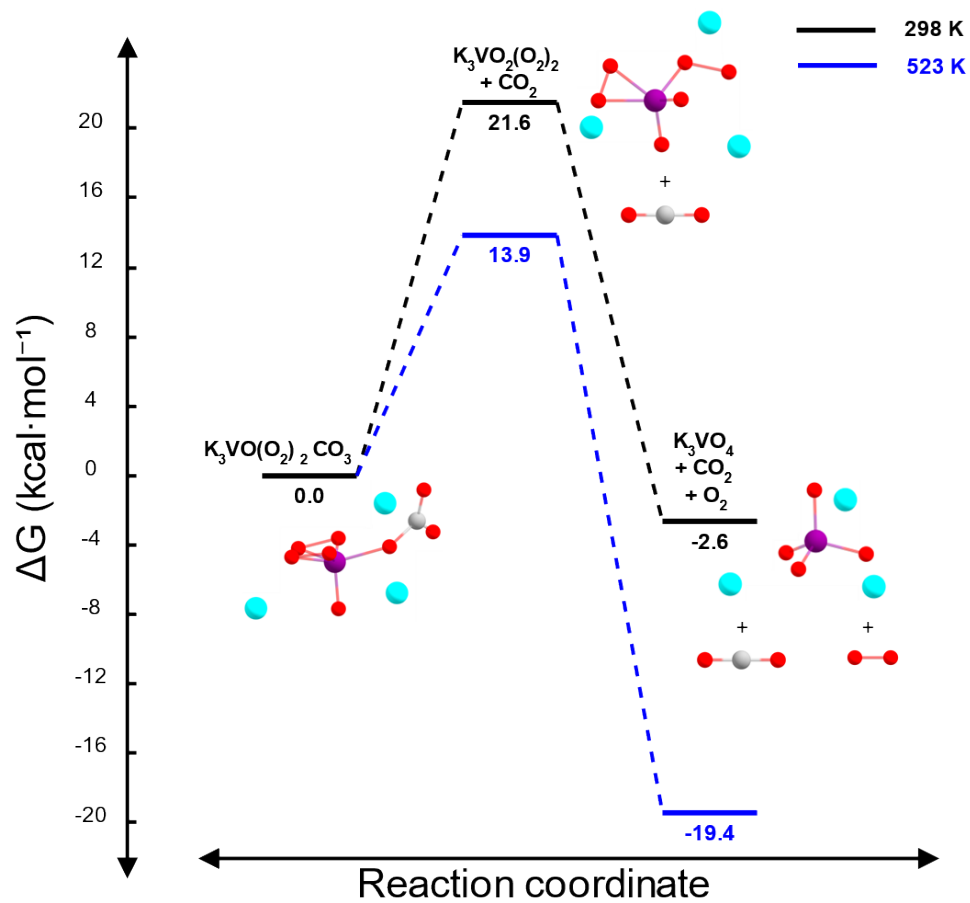

**Figure S14.** Two-step process for the decomposition of  $\text{K}_3\text{VO}(\text{O}_2)_2\text{CO}_3$  into  $\text{K}_3\text{VO}_4$ . The mechanism sequence is (1) uphill removal of  $\text{CO}_2$  and (2) downhill removal of  $\text{O}_2$ . The reaction is predicted to become more spontaneous at elevated temperatures.

### $K_3VO_5CO_3$ and $KVO_3/KHCO_3$ reference data

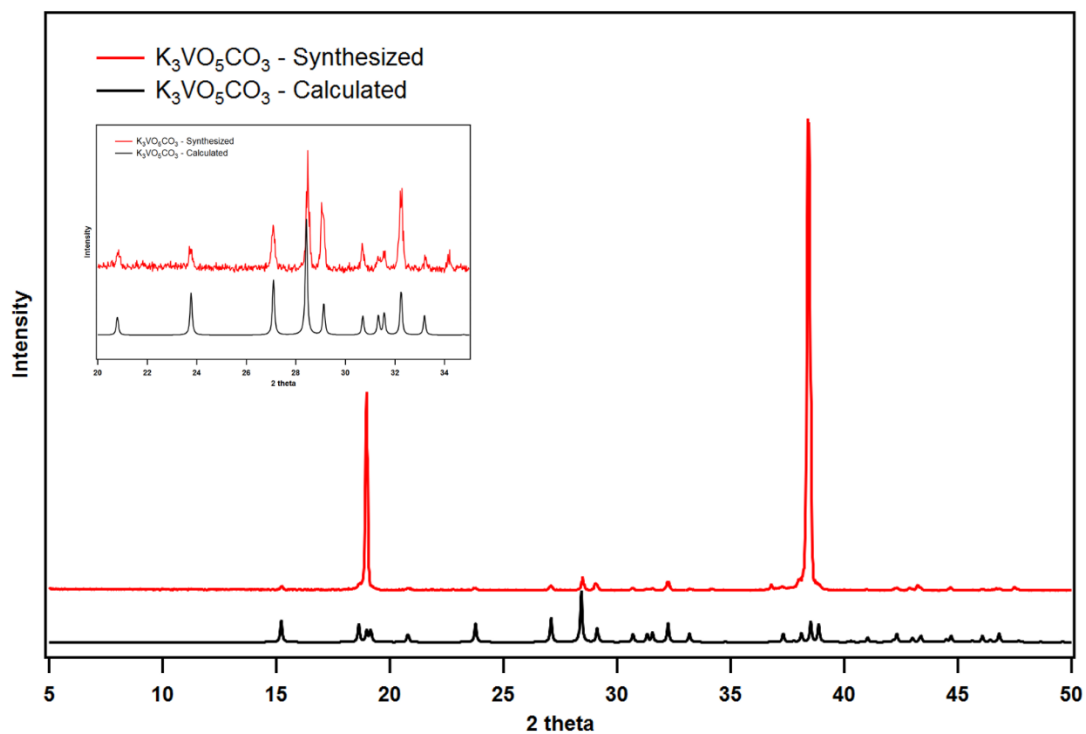

**Figure S15.** The PXRD illustration of synthesized  $K_3VO_5CO_3$  pattern with the calculated result of its single crystal data and a zoomed view from 20° to 35° is shown in the picture.

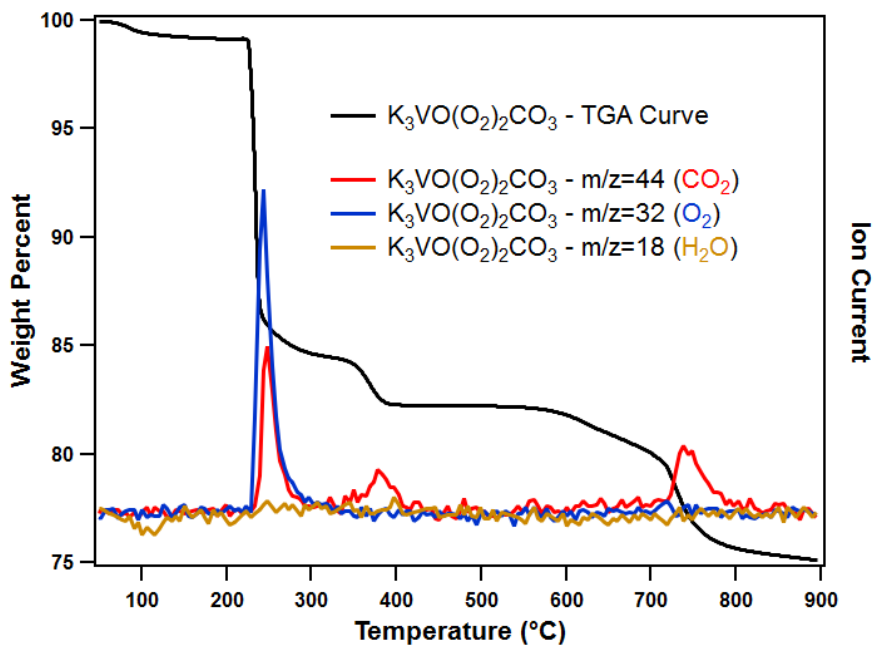

**Figure S16.** TGA-MS spectrum for synthesized  $K_3[VO(O_2)_2CO_3]$ . The  $CO_2$  has a weight percent of 15.03 % (theoretical: 14.27 %); the  $O_2$  is 9.31 % (theoretical: 10.38 %), and the water takes 0.56 %.

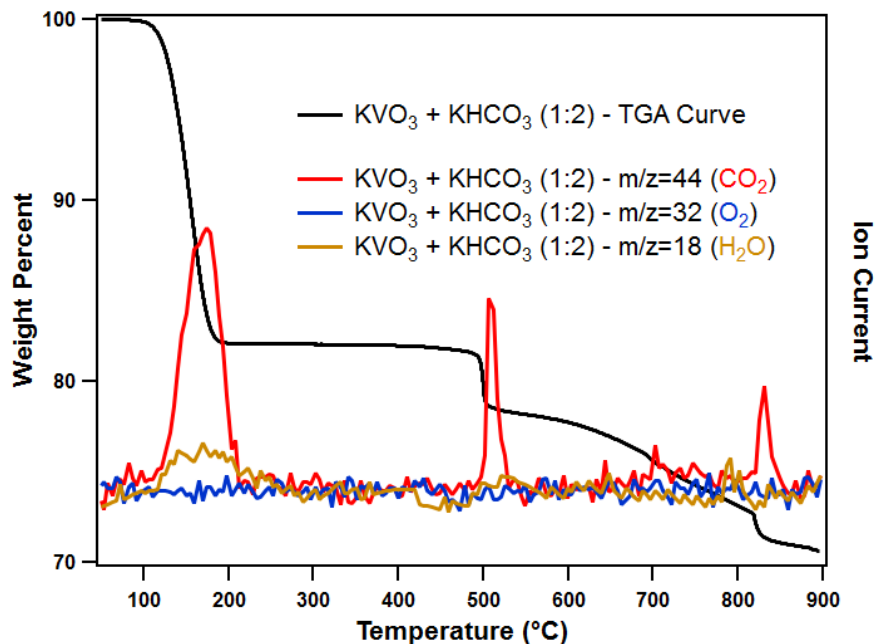

**Figure S17.** TGA-MS spectrum for mixed  $\text{KVO}_3$  and  $\text{KHCO}_3$  (moles ratio = 1:2). The  $\text{KHCO}_3$  is decomposed around 180 °C with 17.94 % weight loss (theoretical: 19.00 %) corresponding to 1 unit  $\text{H}_2\text{O}$  and 1 unit  $\text{CO}_2$ . After the conversion, with the existence of vanadate, residue carbonate can be catalyzed by vanadium source and release  $\text{CO}_2$  around 500 °C. Then, carbonate bonded to potassium is further removed up to 900 °C (11.52% in total).

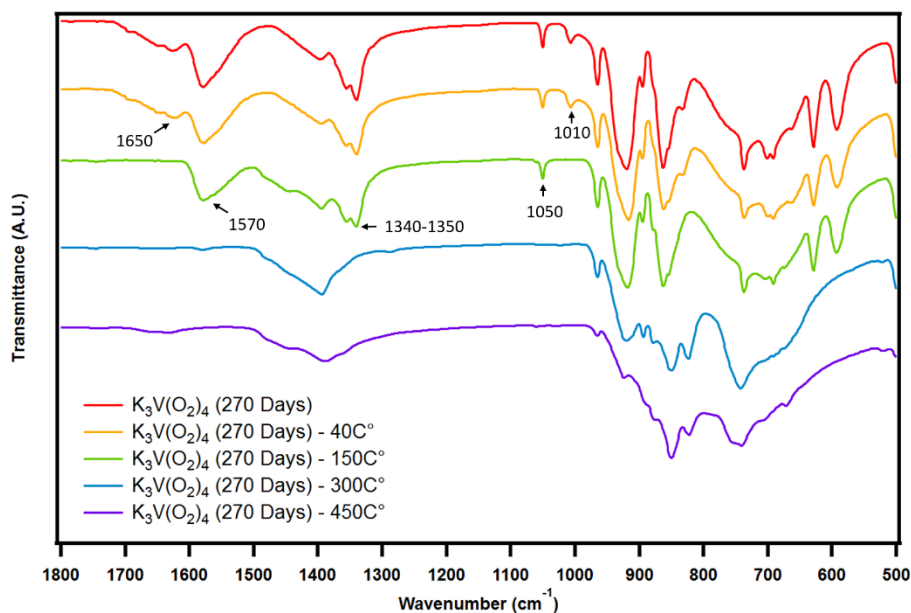

**Figure S18.** FTIR spectra for decomposed  $K_3V(O_2)_4$  (being exposed to the air for 270 days) with isothermal treatments at 40 °C, 150 °C, 300 °C, and 450 °C for 30 minutes. Compared to the  $K_3[VO(O_2)_2(CO_3)]$ , extra peaks at 1650  $cm^{-1}$  and 1010  $cm^{-1}$  correspond to the bicarbonate structure and this compound is stable when the temperature is 40 °C. With increasing temperature, the disappearance of these mentioned peaks suggests the bicarbonate is removed from the material and the IR spectrum at 150 °C matches the compound of  $K_3[VO(O_2)_2(CO_3)]$  (1570  $cm^{-1}$ , 1350  $cm^{-1}$ , and 1050  $cm^{-1}$ ). At higher temperatures, the product turns to a mixture of different vanadates.

### TGA-MS data and Curves

**Table S4.** Results of TGA-MS weight percent loss assigned to different released gasses of  $K_3V(O_2)_4$  after time study experiments under ambient conditions. The associated carbon weight percent content and molar ratio between C/V were also calculated.

| Species | CO <sub>2</sub> % | O <sub>2</sub> % | H <sub>2</sub> O % | C%   | C:V Ratio |
|---------|-------------------|------------------|--------------------|------|-----------|
| Fresh   | -                 | 18.6             | 2.42               | -    | -         |
| Day 5   | 8.29              | 13.4             | 2.26               | 2.26 | 0.57      |
| Day 10  | 10.4              | 13.5             | 2.16               | 2.83 | 0.72      |
| Day 30  | 12.4              | 8.48             | 0.20               | 3.37 | 0.86      |
| Day 90  | 17.7              | 3.56             | 4.01               | 4.84 | 1.25      |
| Day 270 | 21.2              | 2.88             | 3.28               | 5.77 | 1.51      |

**Table S5.** Results of TGA-MS Data of  $\text{Rb}_3\text{V}(\text{O}_2)_4$  Carbon Capture Time Study Experiments under Ambient Conditions.

| Species | $\text{CO}_2$ % | $\text{O}_2$ % | $\text{H}_2\text{O}$ % | C%   | C:V Ratio |
|---------|-----------------|----------------|------------------------|------|-----------|
| Fresh   | 1.45            | 13.5           | 1.52                   | -    | -         |
| Day 5   | 5.66            | 7.40           | 1.37                   | 1.54 | 0.56      |
| Day 10  | 7.20            | 5.30           | 1.77                   | 1.96 | 0.71      |
| Day 30  | 9.43            | 5.30           | 0.84                   | 2.57 | 0.94      |
| Day 90  | 17.5            | -              | 3.54                   | 4.76 | 1.86      |
| Day 270 | 18.4            | -              | 4.09                   | 5.00 | 1.99      |

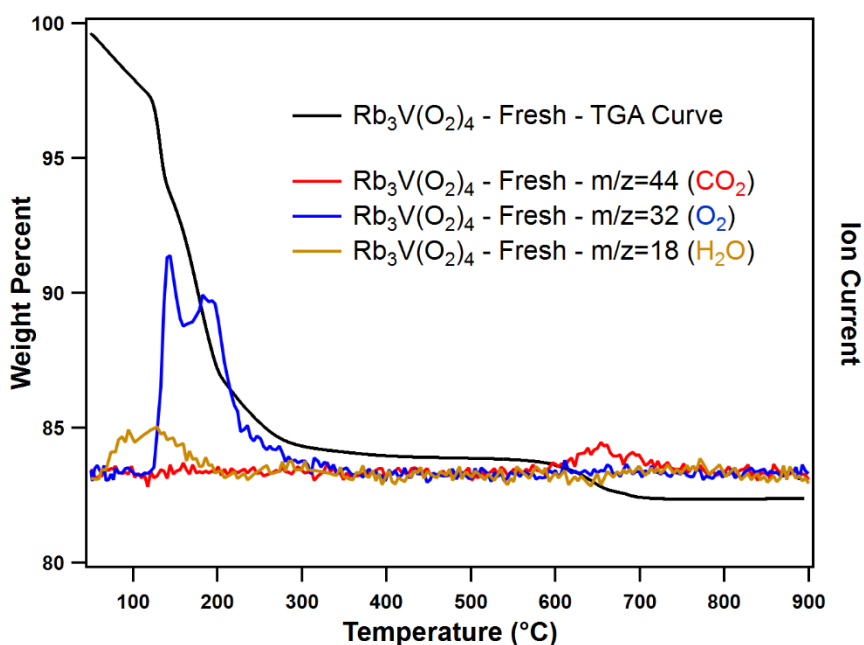

**Figure S19.** TGA curve and MS spectra for fresh synthesized  $\text{Rb}_3\text{V}(\text{O}_2)_4$ . The first weight loss in the temperature range of 60 °C to 105 °C is assigned to a small amount of water (experimental: 1.52 wt %). The continued weight loss from 105 °C to 300 °C originated from the four peroxide ligands bonded to the vanadium center (experimental: 13.46 wt %, theoretical: 14.70 wt %). Some carbon dioxide signals were detected around 600 °C to 750 °C due to the fresh compound 2 quickly reacting to  $\text{CO}_2$  in the air.

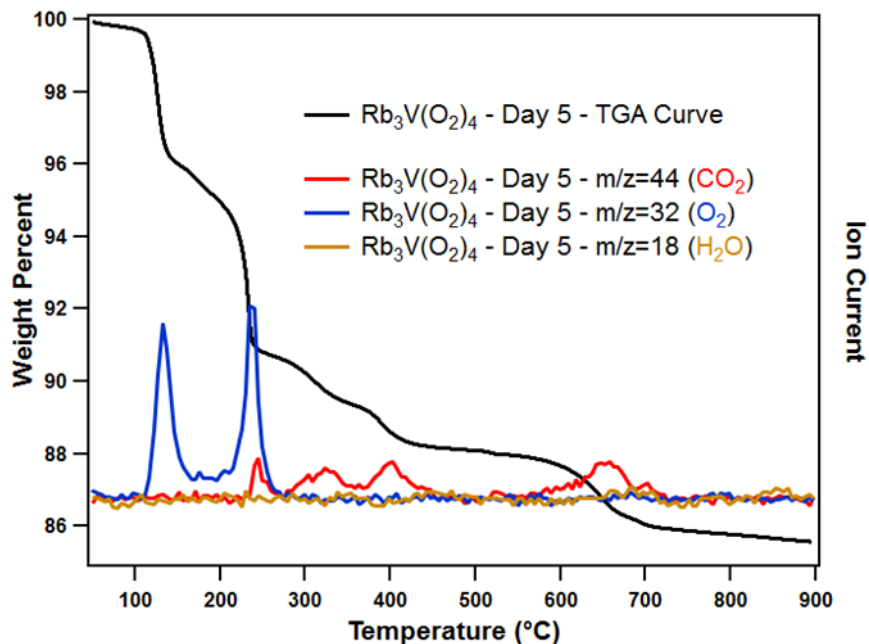

**Figure S20.** TGA curve and MS spectra for  $\text{Rb}_3\text{V}(\text{O}_2)_4$  after being exposed to ambient conditions for 5 days. The TGA-MS shows a stepwise thermal decomposition process associated with (i) molecular oxygen from unreacted peroxide ligands bound to the vanadium metal center (100 – 195 °C), (ii) oxygen and carbon dioxide from peroxides and carbonates bonded to vanadium (195 – 280 °C), and (iii) carbon dioxide from carbonates bonded to alkali metals (280 – 900 °C). The  $\text{CO}_2$  has a weight percent of 5.66 %; the  $\text{O}_2$  is 7.40 %, and the water takes 1.37 %.

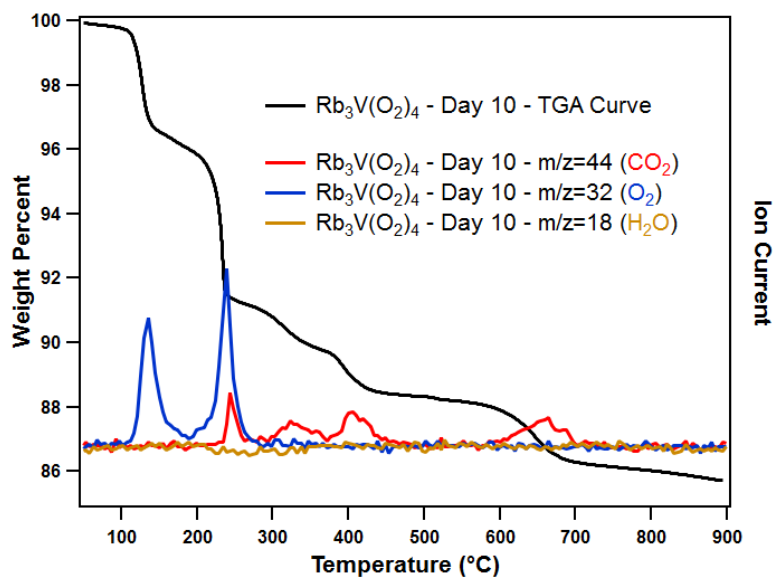

**Figure S21.** TGA curve and MS spectra for  $\text{Rb}_3\text{V}(\text{O}_2)_4$  after being exposed to ambient conditions for 10 days. The  $\text{CO}_2$  has a weight percent of 7.20 %; the  $\text{O}_2$  is 5.30 %, and the water only takes 1.77 %.



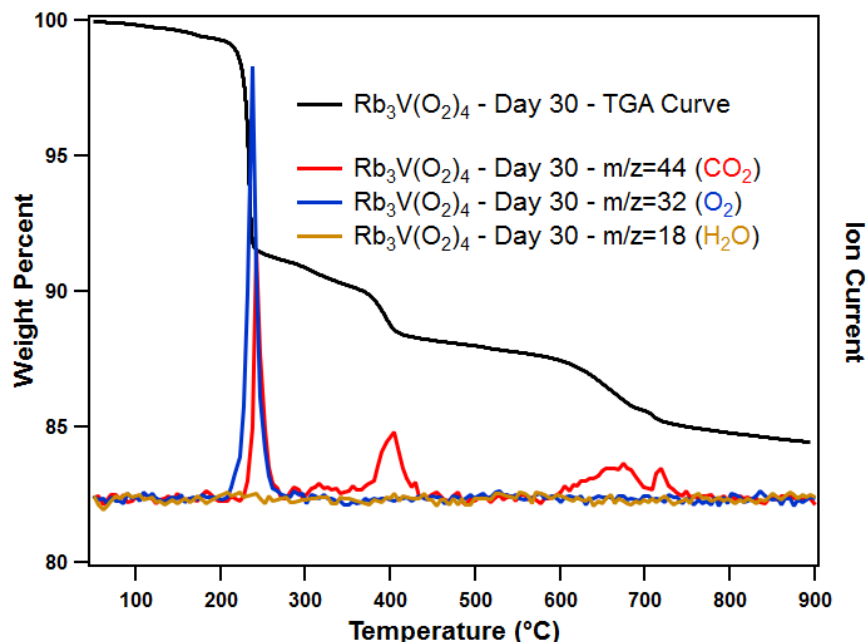

**Figure S22.** TGA-MS spectrum for  $\text{Rb}_3\text{V}(\text{O}_2)_4$  after being exposed to ambient conditions for 30 days. The  $\text{O}_2$  signals were concentrated within the temperature range of 200 – 300 °C, while the  $\text{CO}_2$  peaks were found at 250 °C, 400 °C, and 675 °C. The  $\text{CO}_2$  has a weight percent of 9.43 %; the  $\text{O}_2$  is 5.30 %, and the water only takes 0.84 %.

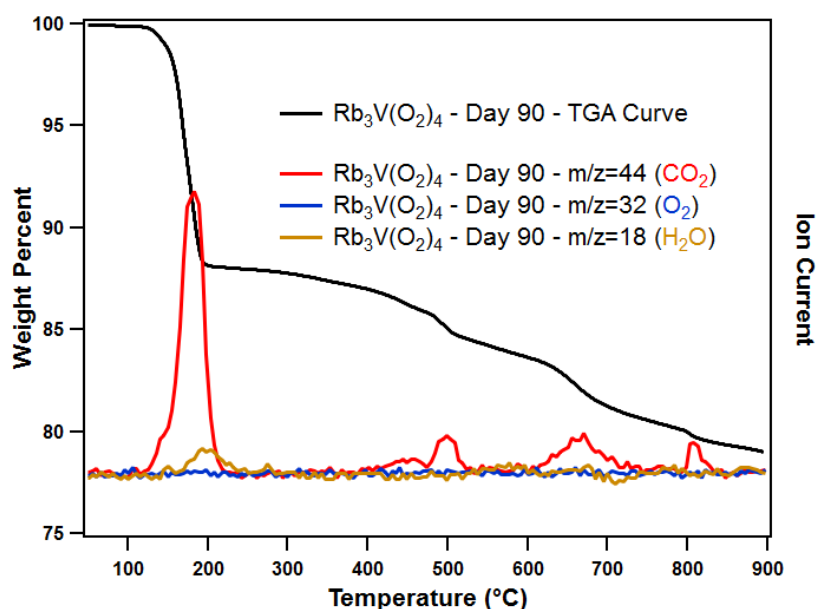

**Figure S23.** TGA-MS spectrum for  $\text{Rb}_3\text{V}(\text{O}_2)_4$  being exposed to ambient conditions for 90 days. A strong  $\text{CO}_2$  peak was found at 185 °C and  $\text{O}_2$  content disappeared, which indicate more  $\text{CO}_2$  absorbed by this product. The  $\text{CO}_2$  has a weight percent of 17.46 % and the water takes 3.54 %.

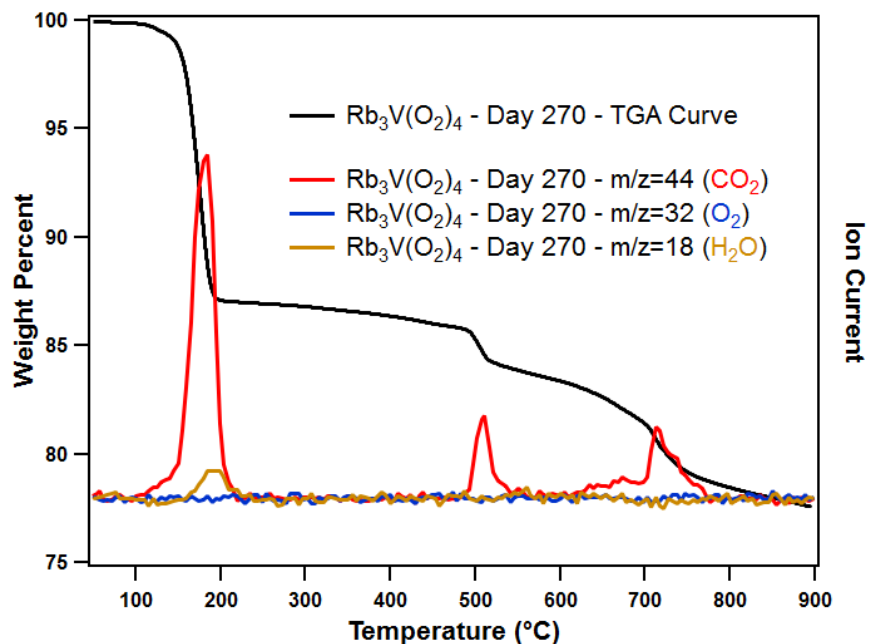

**Figure S24.** TGA-MS spectrum for  $\text{Rb}_3\text{V}(\text{O}_2)_4$  after capturing carbon dioxide under ambient conditions for 270 days. The  $\text{CO}_2$  has a weight percent of 18.35 % and the water takes 4.09 %.

**Table S6.** Results of TGA-MS Data of  $\text{Cs}_3\text{V}(\text{O}_2)_4$  Carbon Capture Time Study Experiments under Ambient Conditions.

| Species | $\text{CO}_2$ % | $\text{O}_2$ % | $\text{H}_2\text{O}$ % | C%   | C:V Ratio |
|---------|-----------------|----------------|------------------------|------|-----------|
| Fresh   | -               | 11.1           | 0.82                   | -    | -         |
| Day 3   | 3.03            | 8.70           | 0.63                   | 0.82 | 0.40      |
| Day 8   | 4.24            | 8.54           | 0.18                   | 1.16 | 0.57      |
| Day 18  | 4.13            | 8.33           | 0.23                   | 1.12 | 0.55      |
| Day 45  | 10.8            | 0.24           | 2.36                   | 2.95 | 1.46      |
| Day 150 | 12.8            | -              | 2.67                   | 3.48 | 1.76      |

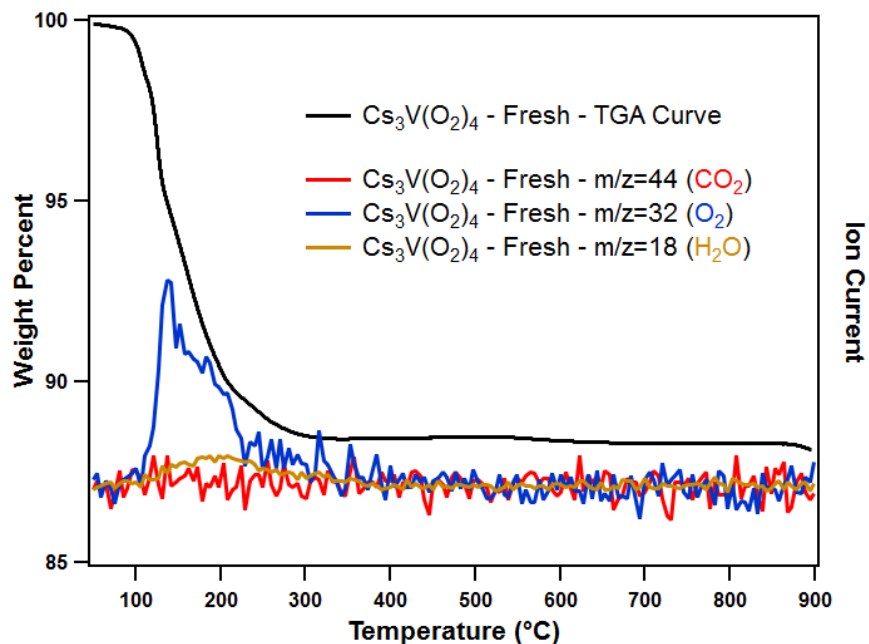

**Figure S25.** TGA curve and MS spectra for fresh synthesized  $\text{Cs}_3\text{V}(\text{O}_2)_4$ . The weight loss in the temperature range of 80 °C to 250 °C is assigned to four peroxide ligands bonded to the vanadium center (experimental: 11.28 wt %, theoretical: 11.08 wt %).

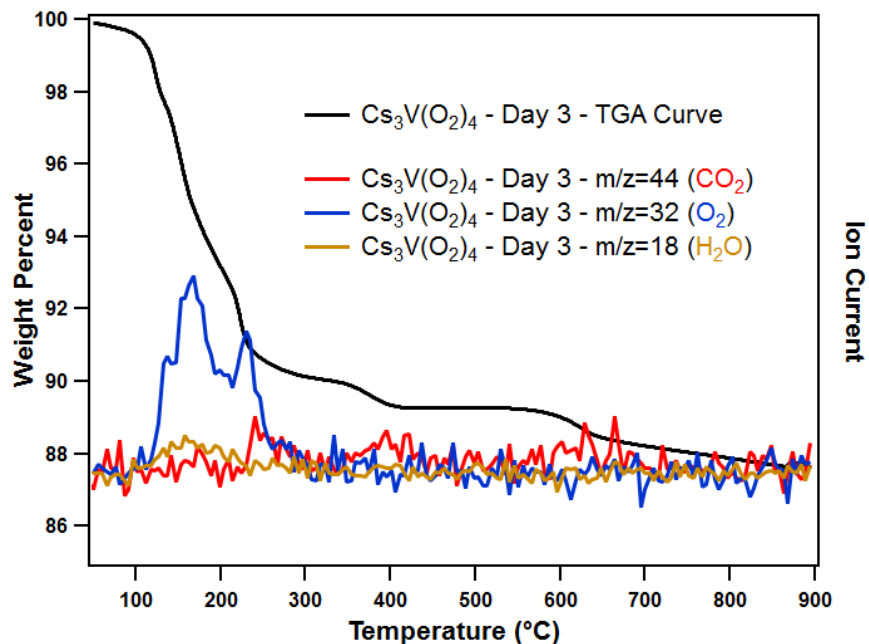

**Figure S26.** TGA curve and MS spectra for  $\text{Rb}_3\text{V}(\text{O}_2)_4$  after being exposed to ambient conditions for 3 days. The TGA-MS shows a stepwise thermal decomposition process associated with (i) molecular oxygen from unreacted peroxide ligands bound to the vanadium metal center (100 – 195 °C), (ii) oxygen and carbon dioxide from peroxides and carbonates bonded to vanadium (195 – 300 °C), and (iii) carbon dioxide from carbonates bonded to alkali metals (300 – 900 °C). The  $\text{CO}_2$  has a weight percent of 3.03 %; the  $\text{O}_2$  is 8.70 %, and the water takes 0.63 %.

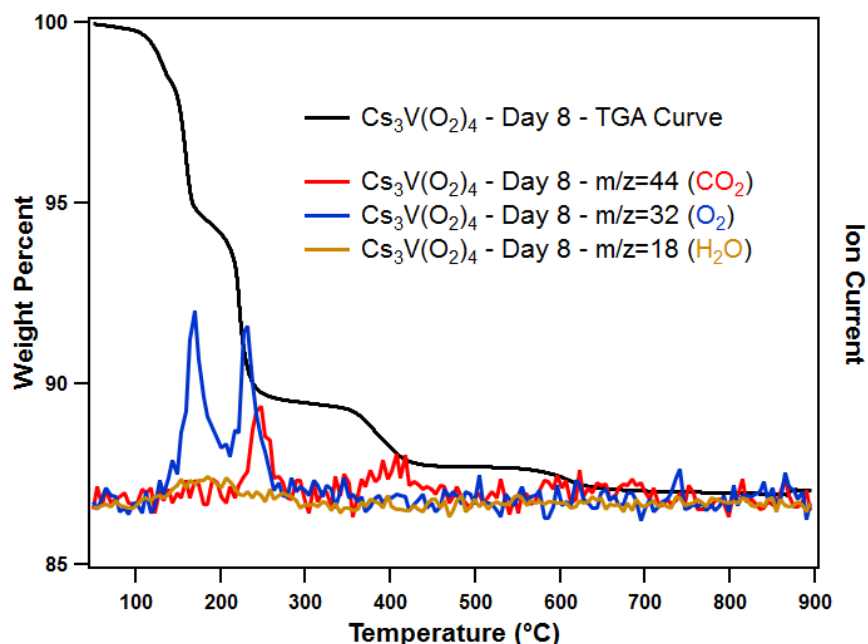

**Figure S27.** TGA curve and MS spectra for  $\text{Cs}_3\text{V}(\text{O}_2)_4$  after being exposed to ambient conditions for 8 days.-The  $\text{CO}_2$  has a weight percent of 4.24 %; the  $\text{O}_2$  is 8.54 %, and the water only takes 0.18 %.

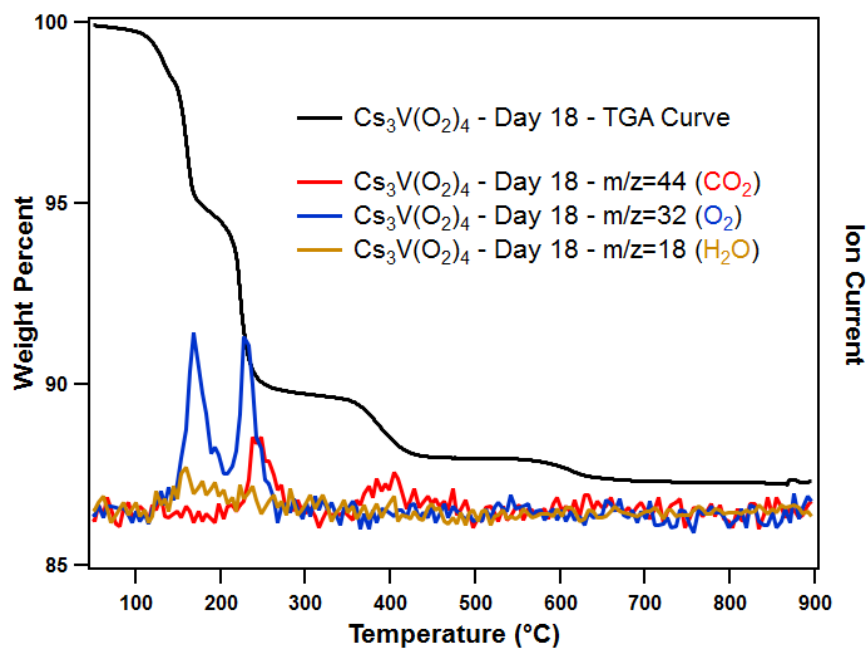

**Figure S28.** TGA-MS spectrum for  $\text{Cs}_3\text{V}(\text{O}_2)_4$  after being exposed to ambient conditions for 18 days. The  $\text{O}_2$  signals were concentrated within the temperature range of 150 – 300  $^{\circ}\text{C}$ , while the  $\text{CO}_2$  peaks were found at 250  $^{\circ}\text{C}$ , 400  $^{\circ}\text{C}$ , and 620  $^{\circ}\text{C}$ . The  $\text{CO}_2$  has a weight percent of 4.13 %; the  $\text{O}_2$  is 8.33 %, and the water only takes 0.23 %.

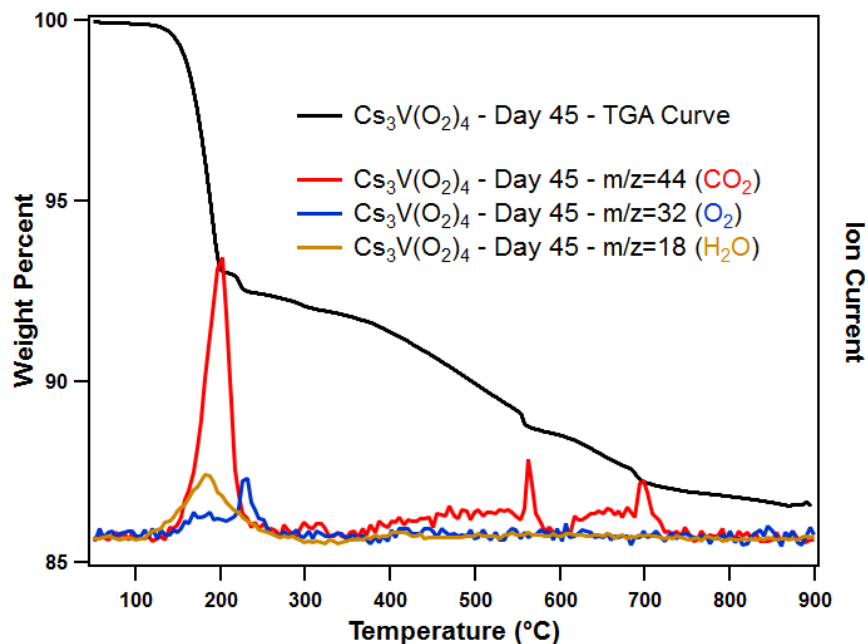

**Figure S29.** TGA-MS spectrum for  $\text{Cs}_3\text{V}(\text{O}_2)_4$  being exposed to ambient conditions for 45 days. A strong  $\text{CO}_2$  peak was found at 200 °C and  $\text{O}_2$  content is almost disappeared, which indicate more  $\text{CO}_2$  absorbed by this product. The  $\text{CO}_2$  has a weight percent of 10.82 % and the water takes 2.36 %.

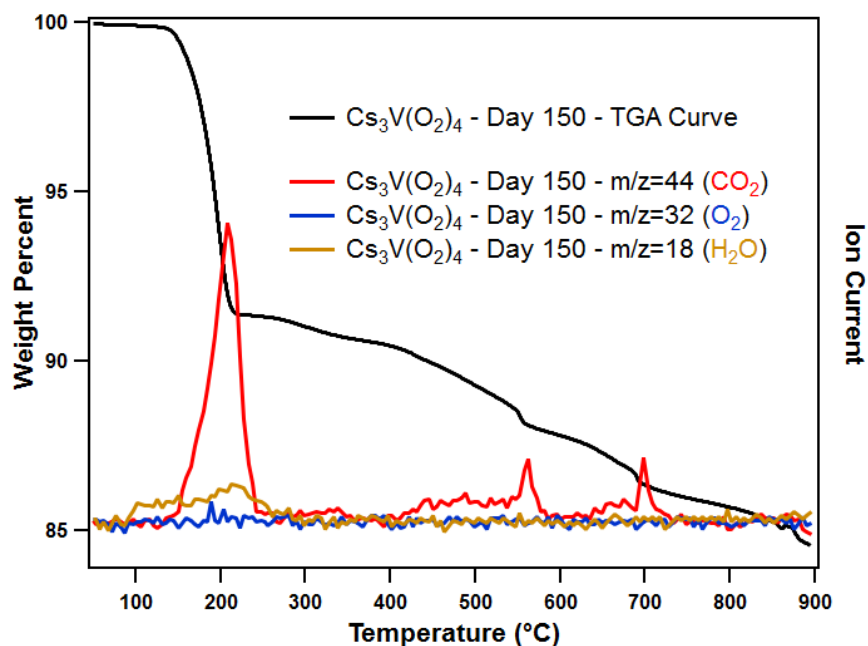

**Figure S30.** TGA-MS spectrum for  $\text{Cs}_3\text{V}(\text{O}_2)_4$  after capturing carbon dioxide under ambient conditions for 150 days. The  $\text{CO}_2$  has a weight percent of 12.77 % and the water takes 2.67 %.

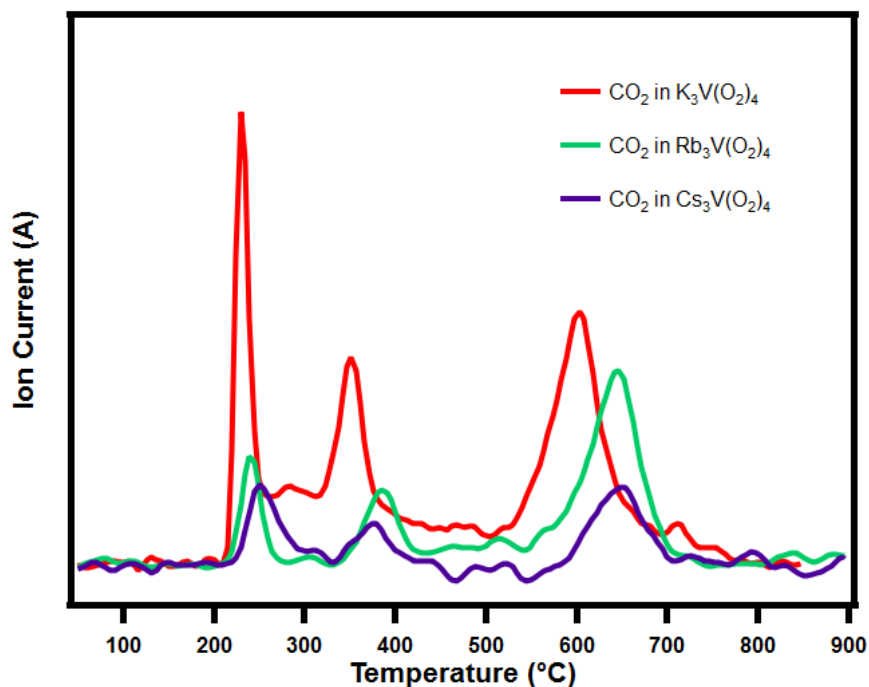

**Figure S31.** MS spectra for all three analogues after capturing carbon dioxide under ambient conditions for 10 days. The CO<sub>2</sub> signal was first detected at 220 °C comparing with the decomposition of peroxides.

### CHN Analysis

**Table S7.** Tetraperoxovanadate CO<sub>2</sub> Capture Performance under ambient condition by TGA-MS

| Material (Powder)                                          | Carbon Weight Percent | Carbon Captured per Molecule | CO <sub>2</sub> capture capacity (mmol/g) |
|------------------------------------------------------------|-----------------------|------------------------------|-------------------------------------------|
| K <sub>3</sub> V(O <sub>2</sub> ) <sub>4</sub> (270 Days)  | 5.77                  | 1.51                         | 5.10                                      |
| Rb <sub>3</sub> V(O <sub>2</sub> ) <sub>4</sub> (270 Days) | 5.00                  | 1.91                         | 4.39                                      |
| Cs <sub>3</sub> V(O <sub>2</sub> ) <sub>4</sub> (150 Days) | 3.48                  | 1.76                         | 3.05                                      |

**Table S8.** Tetraperoxovanadate CO<sub>2</sub> Capture Performance under ambient condition by CHN

| Material (Powder)                                          | Carbon Weight Percent | Carbon Captured per Molecule | CO <sub>2</sub> capture capacity (mmol/g) |
|------------------------------------------------------------|-----------------------|------------------------------|-------------------------------------------|
| K <sub>3</sub> V(O <sub>2</sub> ) <sub>4</sub> (300 Days)  | 5.58                  | 1.46                         | 4.93                                      |
| Rb <sub>3</sub> V(O <sub>2</sub> ) <sub>4</sub> (300 Days) | 5.02                  | 1.92                         | 4.41                                      |
| Cs <sub>3</sub> V(O <sub>2</sub> ) <sub>4</sub> (300 Days) | 3.14                  | 1.56                         | 2.70                                      |

**Table S9.** Tetraperoxovanadate CO<sub>2</sub> Capture Performance Comparison

| Material (Powder)                               | Carbon Captured per Molecule by TGA-MS | Carbon Captured per Molecule by CHN |
|-------------------------------------------------|----------------------------------------|-------------------------------------|
| K <sub>3</sub> V(O <sub>2</sub> ) <sub>4</sub>  | 1.51                                   | 1.46                                |
| Rb <sub>3</sub> V(O <sub>2</sub> ) <sub>4</sub> | 1.91                                   | 1.92                                |
| Cs <sub>3</sub> V(O <sub>2</sub> ) <sub>4</sub> | 1.61                                   | 1.56                                |

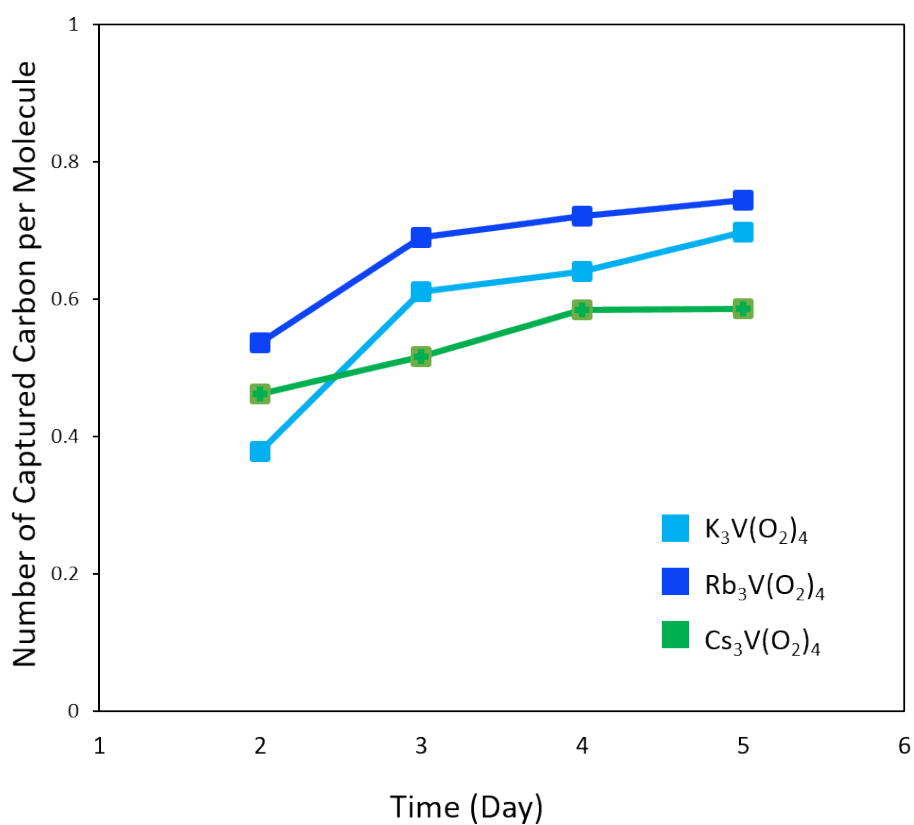

**Figure S32.** Carbon dioxide captured by per tetraperoxovanadate under ambient condition in the first five days.



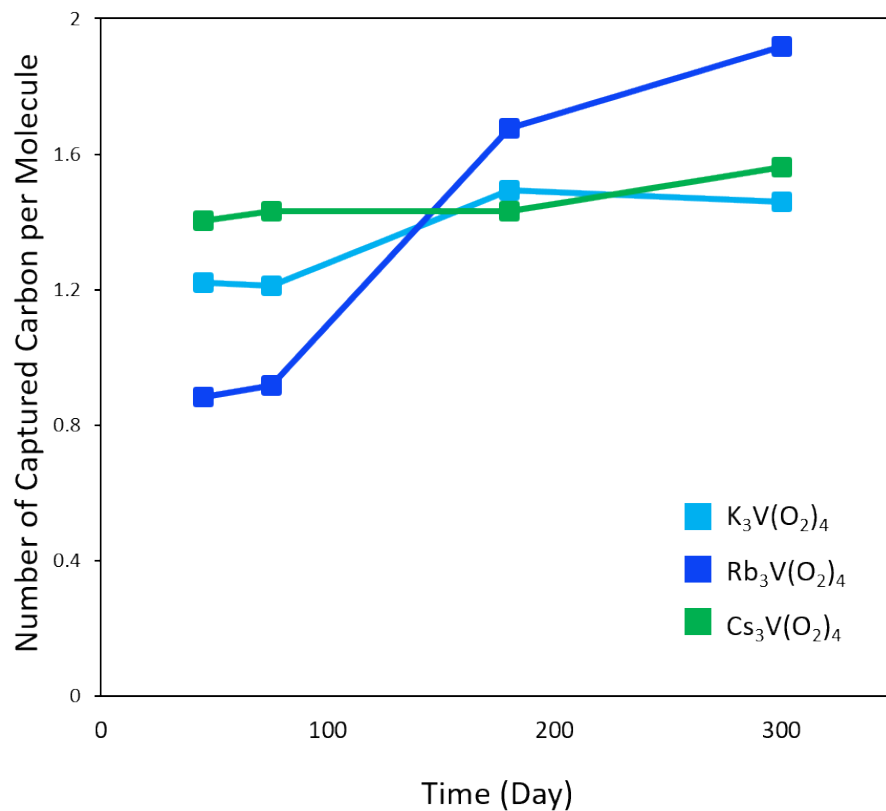

**Figure S33.** Carbon dioxide captured by per tetraperoxovanadate under ambient condition during the last 200 days of monitoring.

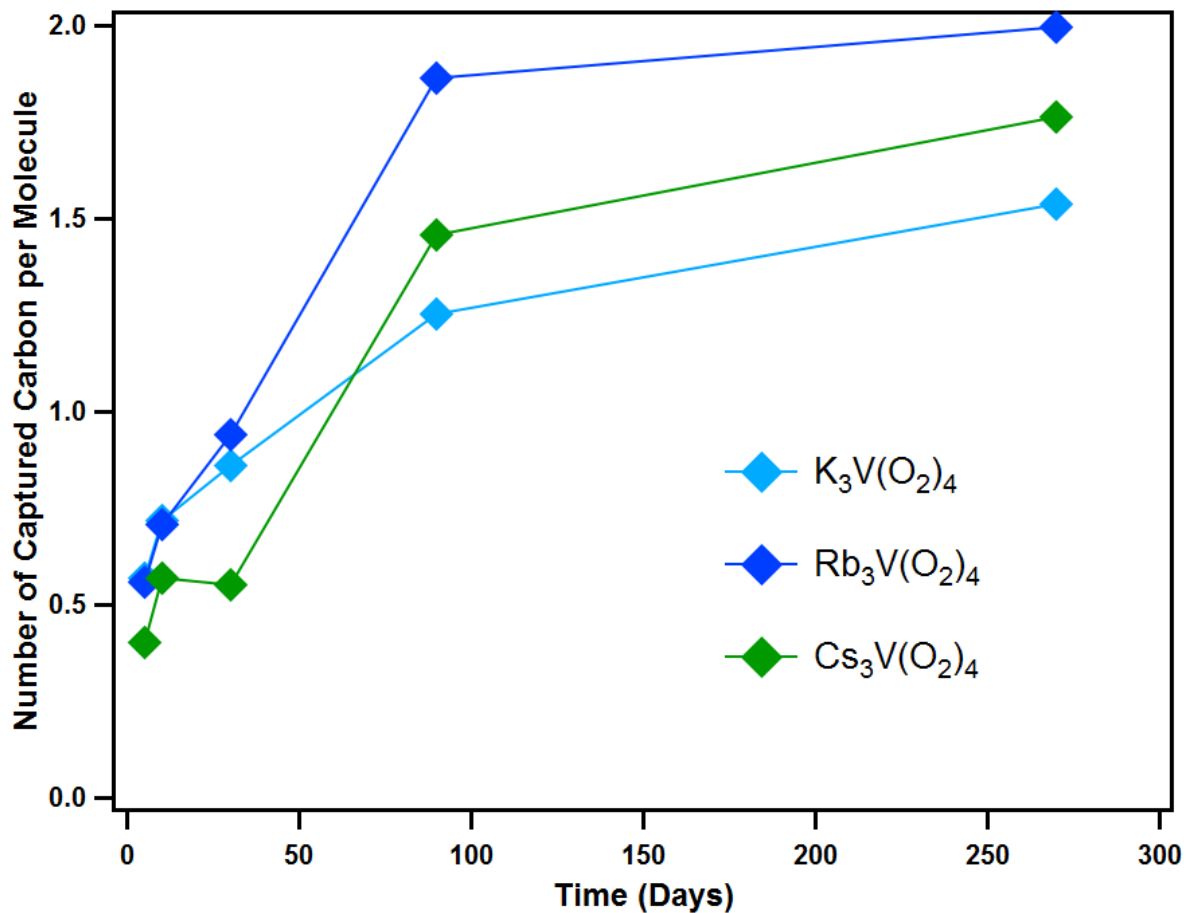

**Figure S34.** Carbon capture performance for decomposed  $A_3V(O_2)_4$  analogues under ambient conditions calculated by combining TGA-MS results.

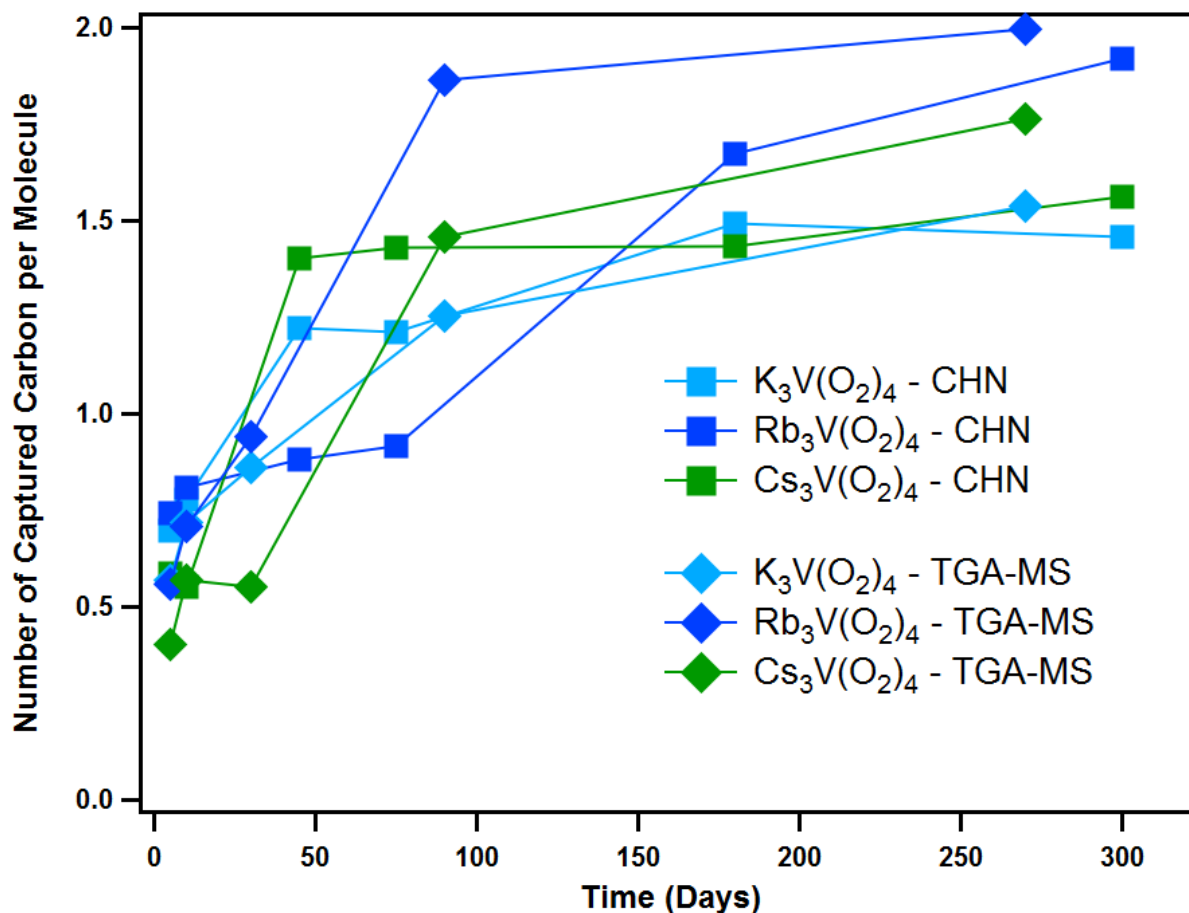

**Figure S35.** Stacked patterns of carbon capture performance for decomposed  $A_3V(O_2)_4$  analogues under ambient conditions determined by CHN and TGA-MS methods.

$$\begin{aligned} \text{Carbon captured per mole} &= \frac{\text{moles of carbon}}{\text{moles of tetraperoxovanadate}} \\ &= \frac{\text{Carbon Weight\%} / \text{Molar Mass of Carbon}}{(1 - \text{Carbon Weight\%}) / \text{Molar Mass of the Tetraperoxide}} \end{aligned}$$

The calculation above is based on Equation S1.

**Equation S1.** Equation used to calculate the amount of carbon captured per molecule

## Superoxide Characterization

### NBT Tests

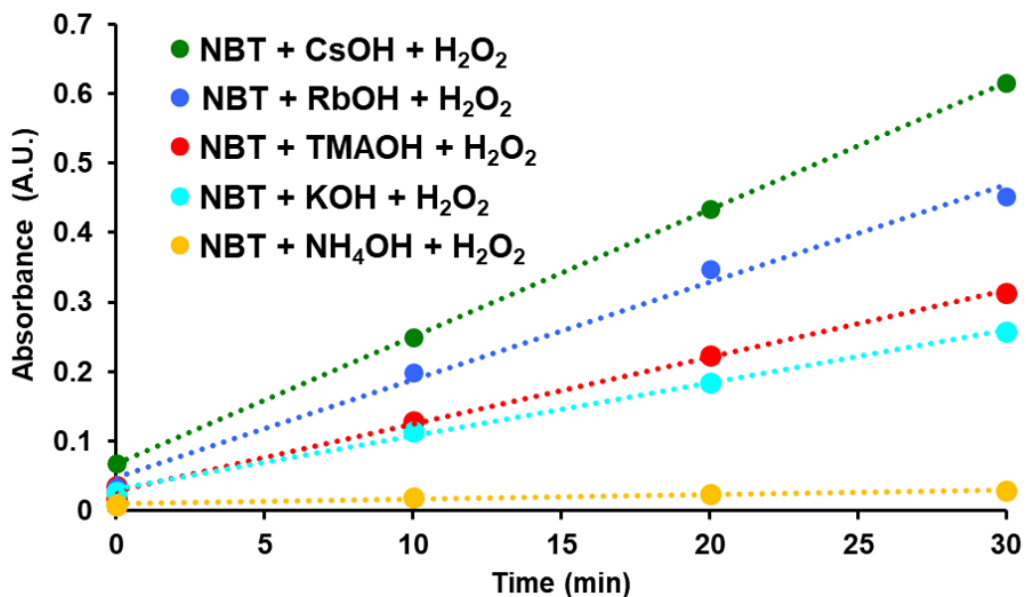

**Figure S36.** Absorbance over time of different hydroxides in water at 551 nm. Adding H<sub>2</sub>O<sub>2</sub> to an aqueous solution of a hydroxide and NBT causes a colour change from yellow to purple. The colour intensity of the solution increases with time.

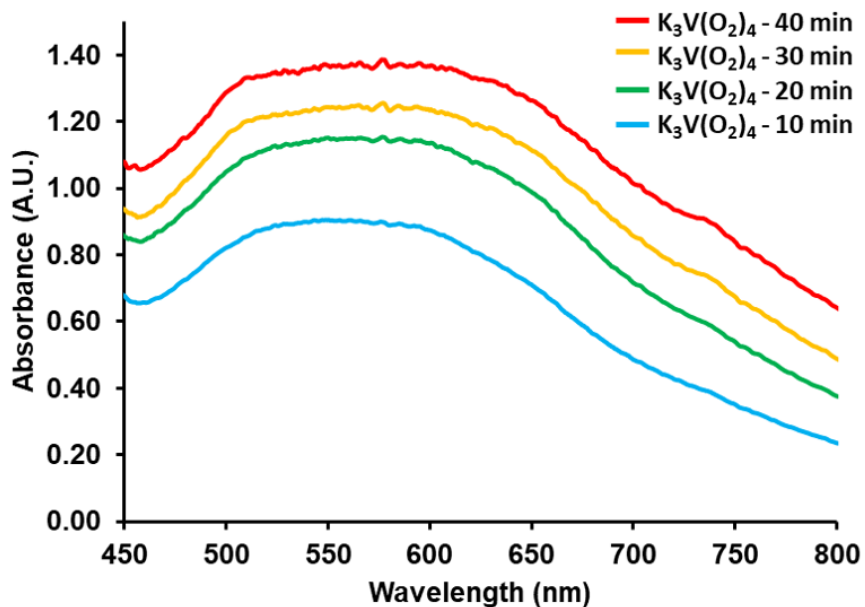

**Figure S37.** Full absorbance spectrum of K<sub>3</sub>V(O<sub>2</sub>)<sub>4</sub> at different time stamps. The reduction product of NBT (formazan) displays its maximum intensity at 551 nm.

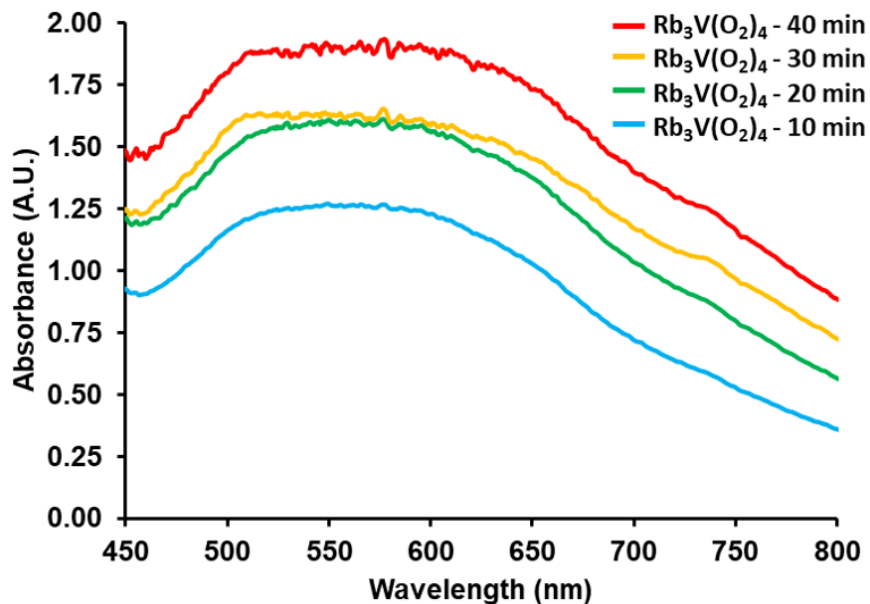

**Figure S38.** Absorbance of  $\text{Rb}_3\text{V}(\text{O}_2)_4$  at different time stamps. The reduction product of NBT (formazan) displays its maximum intensity at 551 nm.

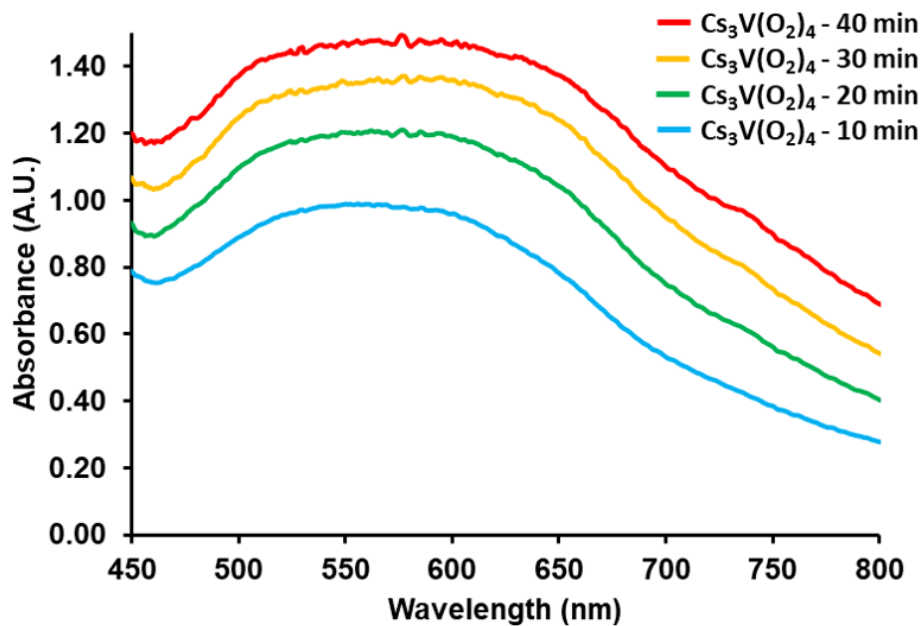

**Figure S39.** Absorbance of  $\text{Cs}_3\text{V}(\text{O}_2)_4$  at different time stamps. The reduction product of NBT (formazan) displays its maximum intensity at 551 nm.

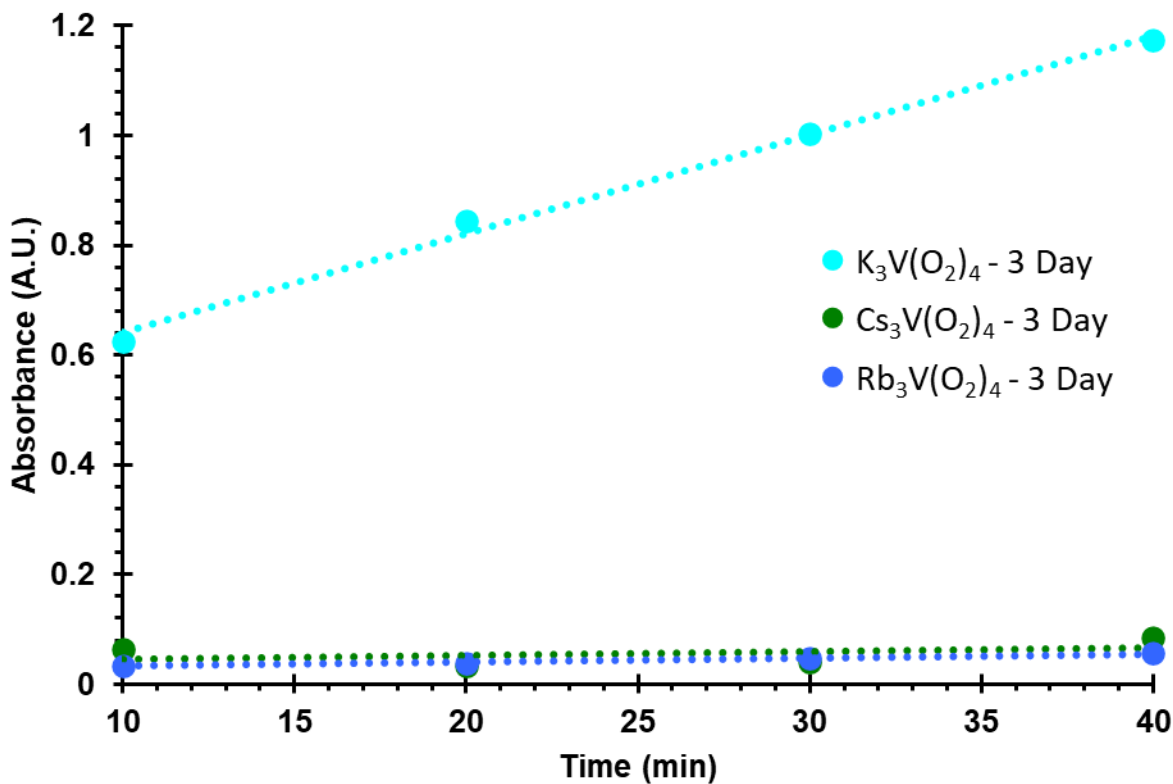

**Figure S40.** Absorbance rate (551 nm) of  $A_3V(O_2)_4$  analogues after 3 days exposed to air. The Rb and Cs analogues decomposed rapidly and by the time the samples were reacted with NBT the solid had fully changed colour to yellow.  $K_3V(O_2)_4$  retained the purple colour characteristic of the fresh materials and presented a similar behaviour to that of a fresh sample.

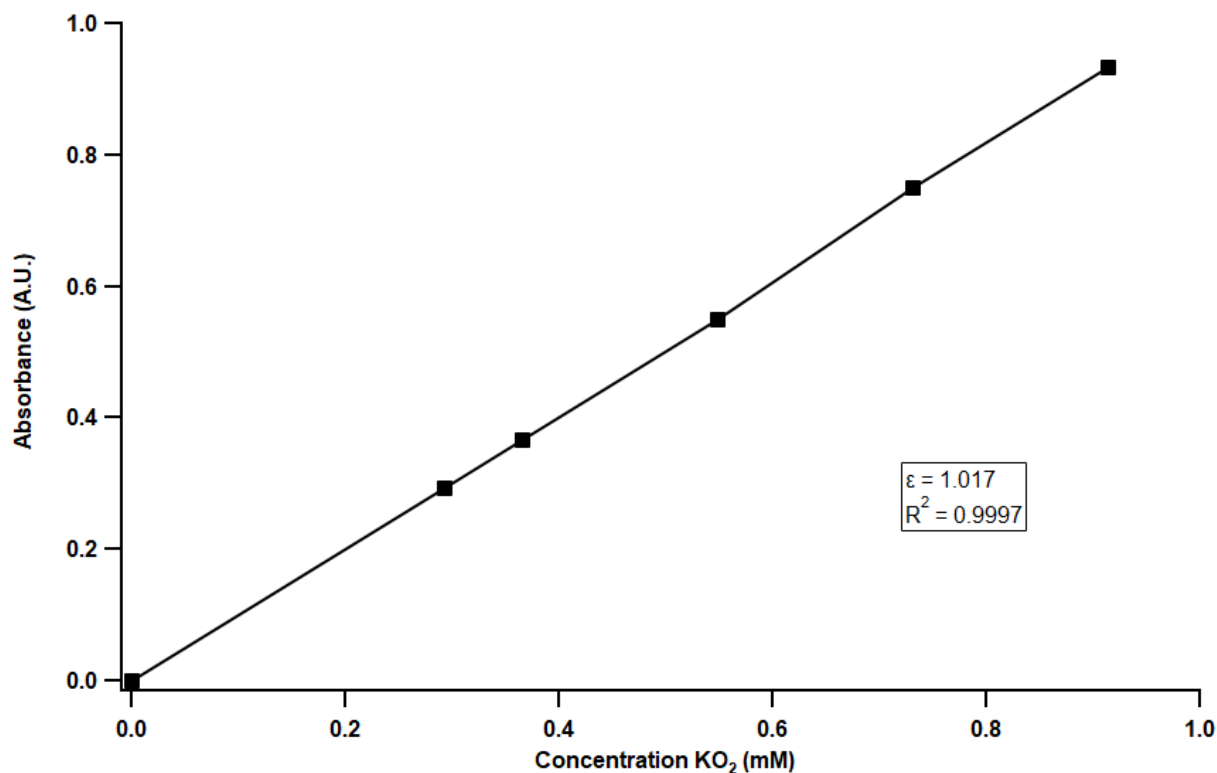

**Figure S41.**  $\text{KO}_2$  calibration curve. Different dilutions of an aqueous  $\text{KO}_2$ -NBT solution were prepared and measured. The maximum absorbance at 551 nm was plotted vs. the concentration of  $\text{KO}_2$  to allow for quantification of  $\text{KO}_2$  in the tetraperoxovanadate materials.

**Table S10.** Comparison between different fits for the trend line of concentration of superoxide vs. time for  $\text{A}_3\text{V}(\text{O}_2)_4$  from the NBT tests

| Compound                            | $R^2$ Linear Fit | $R^2$ Power Fit |
|-------------------------------------|------------------|-----------------|
| $\text{K}_3\text{V}(\text{O}_2)_4$  | 0.95239          | 0.98863         |
| $\text{Rb}_3\text{V}(\text{O}_2)_4$ | 0.91504          | 0.93972         |
| $\text{Cs}_3\text{V}(\text{O}_2)_4$ | 0.97961          | 0.99999         |

## EPR Characterization

**Table S11.** EPR data summary (100K)

| Phase                               | $g_{\text{parallel}}$ | $g_{\text{perpendicular}}$ | Mole% superoxide <sup>1</sup> |
|-------------------------------------|-----------------------|----------------------------|-------------------------------|
| $\text{K}_3\text{V}(\text{O}_2)_4$  | 2.148<br>2.128        | 2.013                      | 4.9                           |
| $\text{Rb}_3\text{V}(\text{O}_2)_4$ | 2.157<br>2.136        | 2.014                      | 5.1                           |
| $\text{Cs}_3\text{V}(\text{O}_2)_4$ | 2.113                 | 2.016                      | 4.2                           |
| $\text{KO}_2/\text{DMSO}$           | 2.113                 | 2.014                      | N/A                           |

<sup>1</sup>assuming peroxide replacement with superoxide; i.e.  $A_{3-x}\text{V}(\text{O}^{2-}_2)_{4-x}(\text{O}^{1-}_2)_x$

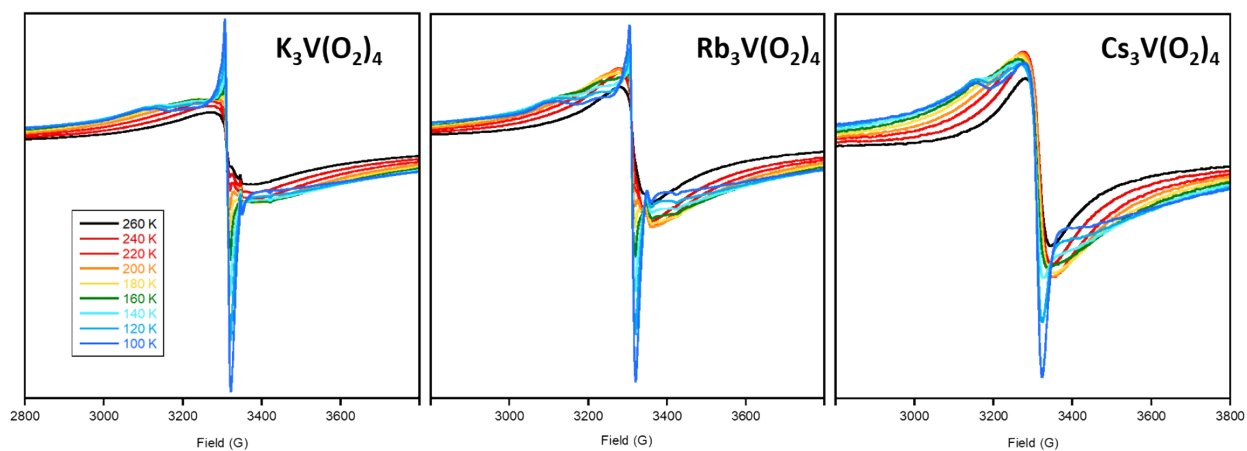

**Figure S42.** Variable temperature EPR spectra collected between 100 K and 260 K.



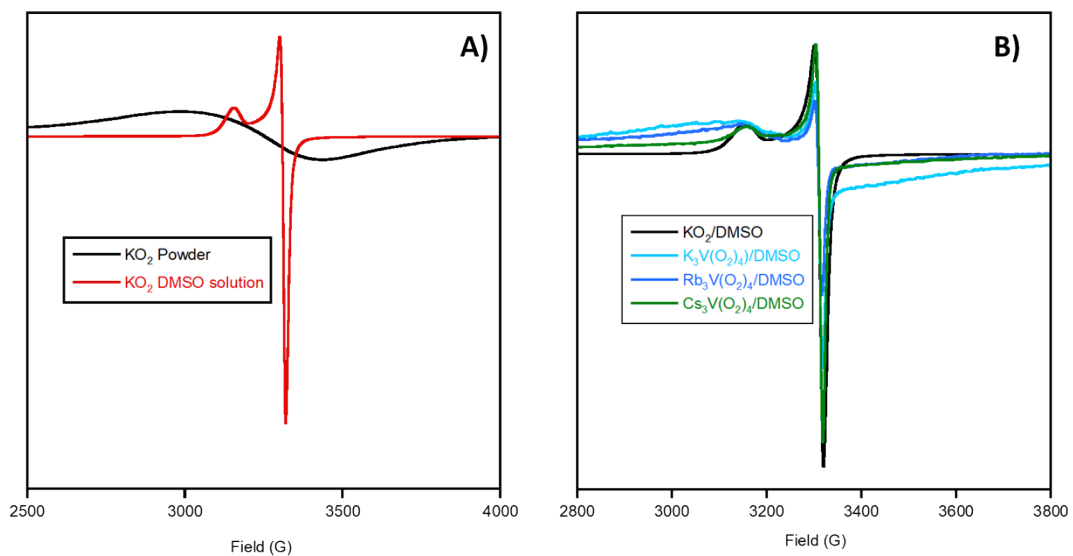

**Figure S43. A)** Potassium superoxide EPR spectra at 100 K.  $\text{KO}_2$  powder as received (black),  $\text{KO}_2$  dissolved in DMSO (red). The broad, featureless spectrum of the powder is due to magnetic interactions between neighboring paramagnetic sites. When dissolved in a solvent, the spin-spin distance increases allowing the spectrum to reflect an isolated radical. **B)** EPR spectra in DMSO solutions at 100 K. Compounds were vortexed in DMSO, then spun down in a centrifuge and the supernatant collected.

## Exploring superoxide through computation.

**Table S12.** Calculated energies of spin states for vanadium peroxo-superoxocomplexes. In the DFT-optimized structures, peroxide ligands are depicted in red and superoxide ligands are shown in salmon. Select bond lengths are provided in Å. (D) Relative room-temperature Gibbs free energies (with raw electronic energies in parentheses) of the considered spin states for  $K_3V(O_2)_4$ ,  $Rb_3V(O_2)_4$ , and  $Cs_3V(O_2)_4$  in kcal/mol. Peroxo/superoxo designations were based on the calculated O-O bond lengths and Mulliken spin densities. The triplet state corresponds to having one unpaired electron on the vanadium, forming  $V^{4+}$ , and another on one of the ligands, forming  $O_2^-$  superoxide. Given the small energy difference between the singlet (4 peroxide) and triplet state (3 peroxide and 1 superoxide), some amount of superoxide is expected to be present in all  $A_3V(O_2)_4$  samples at room temperature; the quintet state (2 peroxide and 2 superoxide) is predicted to be energetically inaccessible in all cases.

| $A_3V(O_2)_4$                                        | <b>S=0, singlet</b>                                                                 | <b>S=1, triplet</b>                                                                  | <b>S=2, quintet</b>                                                                   |
|------------------------------------------------------|-------------------------------------------------------------------------------------|--------------------------------------------------------------------------------------|---------------------------------------------------------------------------------------|
| K                                                    | 0.0 (0.0), 4 peroxo                                                                 | 0.9 (1.6), 3 peroxo, 1 superoxo                                                      | 45.0 (47.1); 2 peroxo, 2 superoxo                                                     |
| Rb                                                   | 0.0 (0.0), 4 peroxo                                                                 | 1.6 (3.0), 3 peroxo, 1 superoxo                                                      | 39.0.0 (42.1); 2 peroxo, 2 superoxo                                                   |
| Cs                                                   | 0.0 (0.0), 4 peroxo                                                                 | 2.7 (4.3), 3 peroxo, 1 superoxo                                                      | 37.2 (40.0); 2 peroxo, 2 superoxo                                                     |
| <i>Illustrations of singlet, triplet and quintet</i> |                                                                                     |                                                                                      |                                                                                       |
|                                                      | 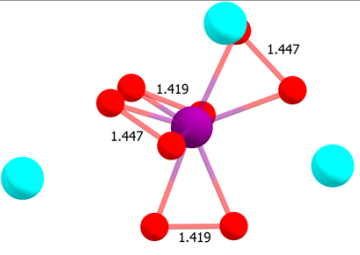 |  |  |

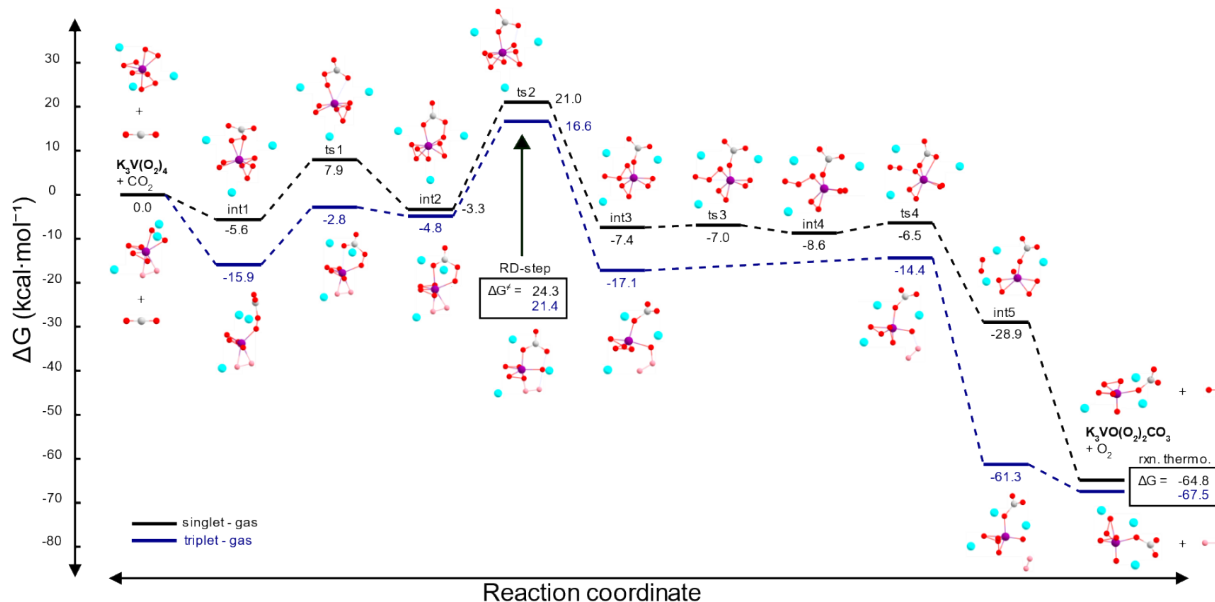

**Figure S44.** DFT reaction mechanism for  $\text{K}_3\text{V}(\text{O}_2)_4 + \text{CO}_2 \rightarrow \text{K}_3\text{VO}(\text{O}_2)_2\text{CO}_3 + \text{O}_2$ . ts=transition state, int=intermediate. The relative energies on the singlet potential energy surface are shown in black with the corresponding structures above (identical to Figure S11). The steps on the triplet surface are in blue with the structures below, which include some superoxide oxygen atoms depicted in salmon red. The triplet mechanism involves the superoxide ligand starting in ts2 in which an oxygen atom is transferred to it, generating  $\text{O}_3^-$ . In the subsequent step, ts4, one of the O-O bonds in  $\text{O}_3^-$  is cleaved to produce  $^3\text{O}_2$  and singlet  $\text{K}_3\text{VO}(\text{O}_2)_2\text{CO}_3$ , thereby removing superoxide from the complex. In terms of the impact on carbon capture reactivity, superoxide ligands slightly lower the barrier of the rate-determining step ( $\sim 3$  kcal/mol), ts2, and increase the thermodynamic driving force by approximately the same amount. A direct reaction between  $\text{CO}_2$  and the superoxide ligand was explored but seems to be incapable of proceeding beyond int1. Note that the final product in both spin cases consists of a singlet  $\text{K}_3\text{VO}(\text{O}_2)_2\text{CO}_3$  and triplet  $\text{O}_2$ .

## Carbon Capture technologies overview

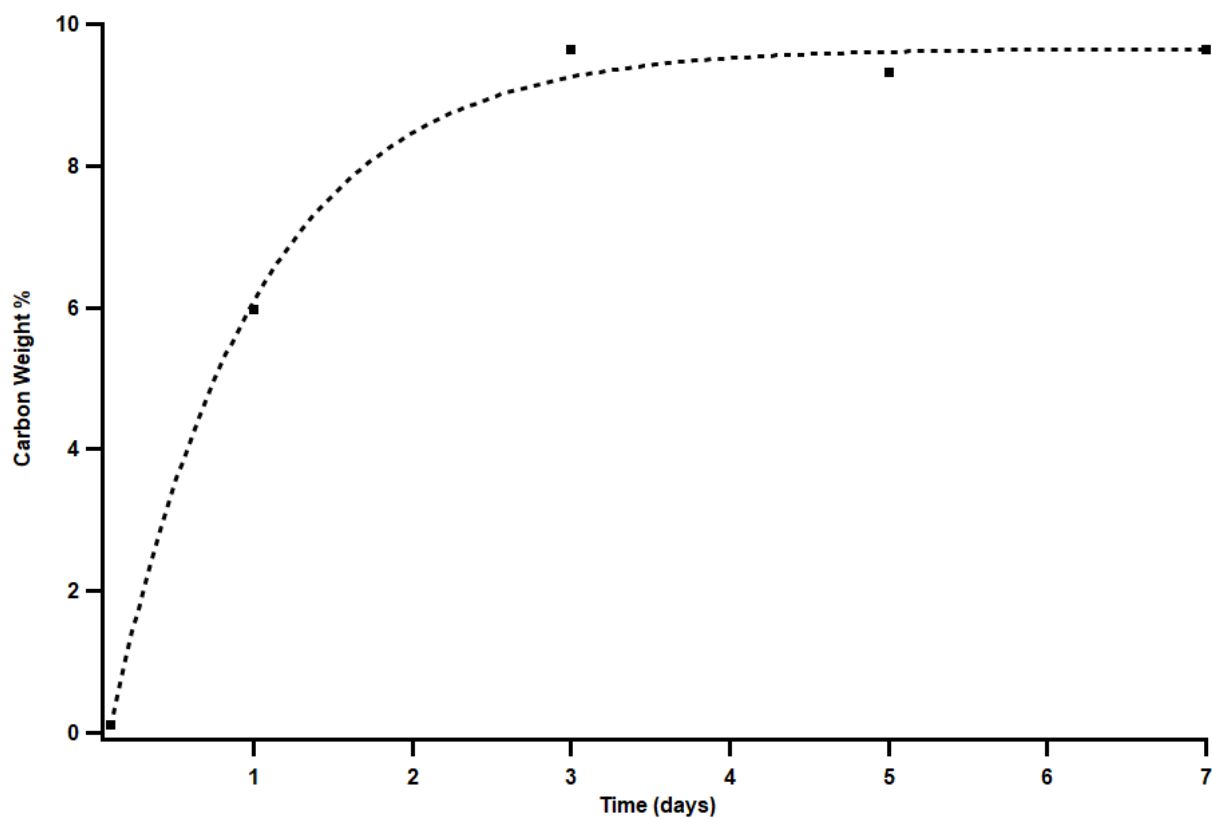

**Figure S45.** Carbon capture of  $\text{Na}_2\text{O}_2$  exposed to atmospheric conditions over time. The fresh material reaches its maximum carbon content of 9.6 % after 3 days, at which point remains constant.

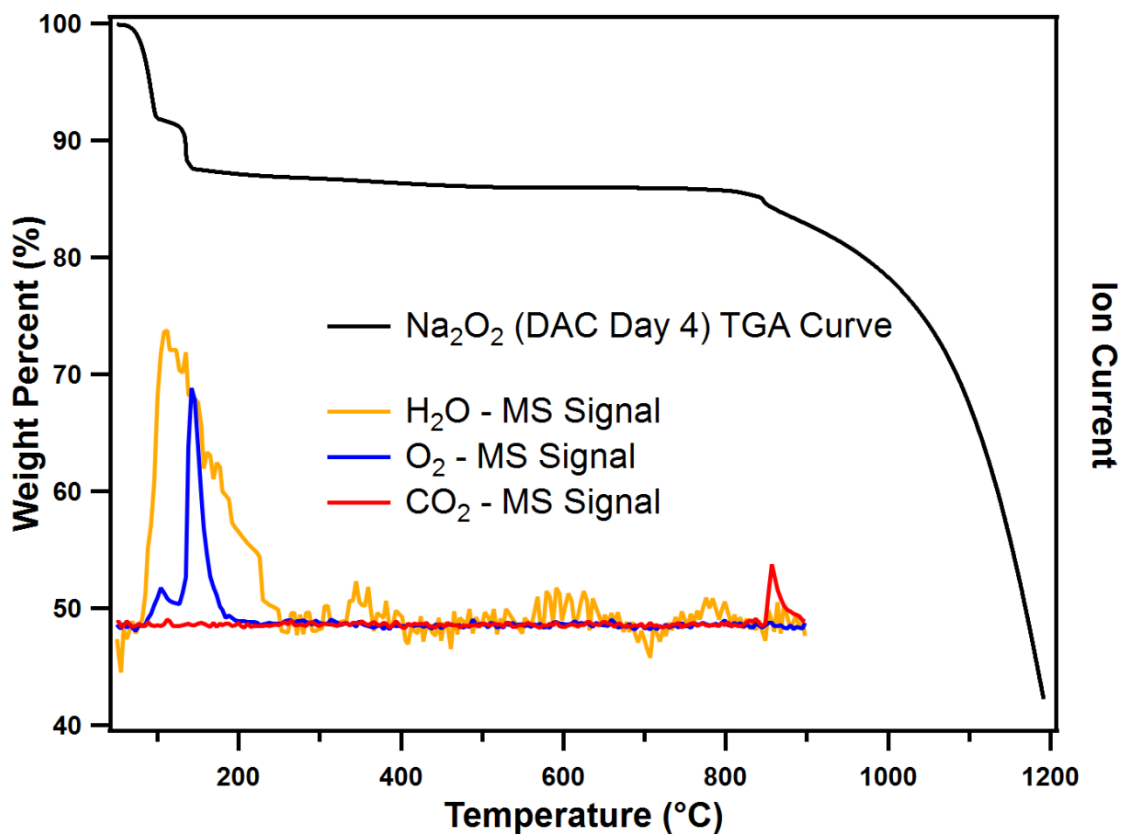

**Figure S46.** TGA-MS spectrum of Na<sub>2</sub>O<sub>2</sub> exposed to air for 4 days. The initial weight loss below 100 °C is assigned to water captured. Oxygen from unreacted material is released right after. There are no MS signals from CO<sub>2</sub> below 800 °C. Beyond this point the MS signals become unreliable and thus are cut. The final weight loss starting around 900 °C is due to the high temperature release of CO<sub>2</sub> captured.

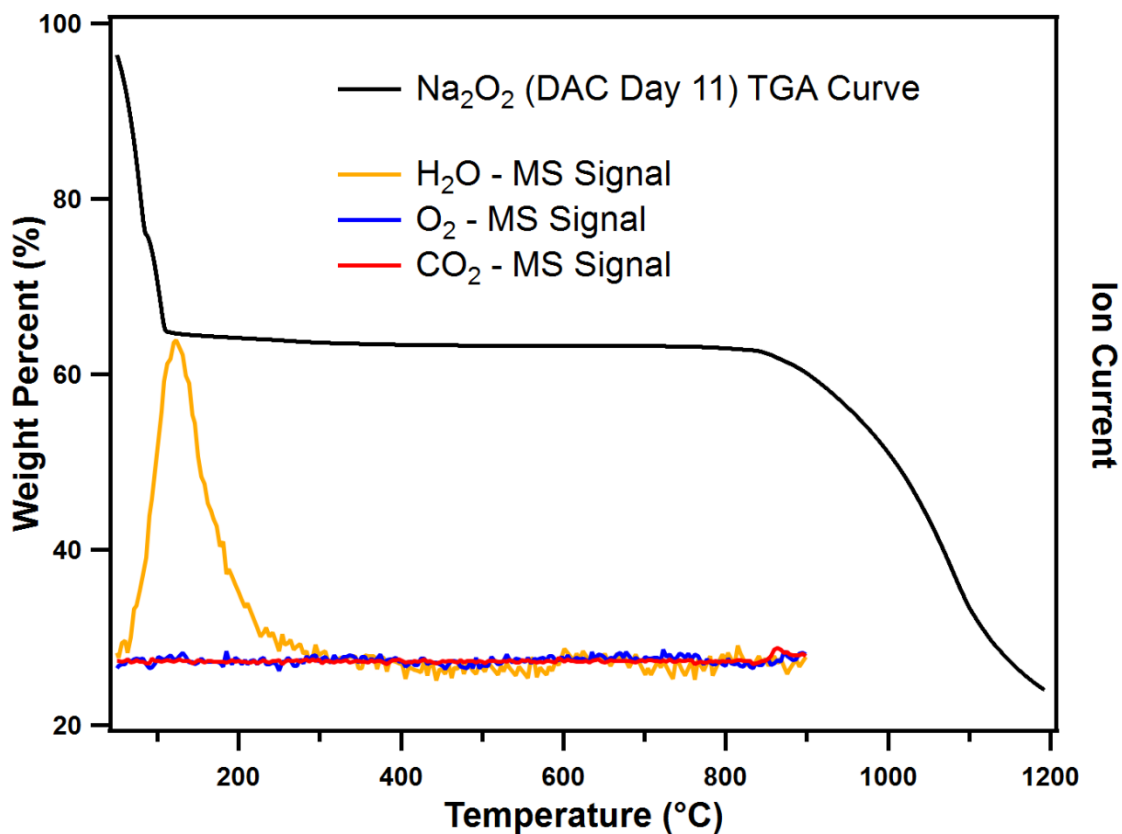

**Figure S47.** TGA-MS spectrum of  $\text{Na}_2\text{O}_2$  exposed to air for 11 days, when there was an increase in the ambient humidity. The initial water peak that previously accounted for less than 5 % weight loss now accounts for over 30 % of the material. The lack of an oxygen signal indicates that all of the  $\text{Na}_2\text{O}_2$  has reacted. As above, the  $\text{CO}_2$  release starts around 900  $^{\circ}\text{C}$ .

**Table S13.** A comparison between select technologies for carbon capture.

| Absorption / adsorption type                              | Carbon Capture Material            | Modification scheme                     | Temp. (°C) | Carbon capture conditions                                                                           | Capacity (mmol g <sup>-1</sup> ) | Ref. |
|-----------------------------------------------------------|------------------------------------|-----------------------------------------|------------|-----------------------------------------------------------------------------------------------------|----------------------------------|------|
| Liquid-based CO <sub>2</sub> capture system               | Liquid amine-based solvents        | Blended amine solvents                  | 40         | 100% CO <sub>2</sub> , until equilibrium                                                            | 1.01                             | 17   |
|                                                           | Ionic liquid-based solvents        | Amine- or amino-acid-functionalized ILs | 40         | 100% CO <sub>2</sub> , 5 bar, for 4 h                                                               | 1.60                             |      |
| Low-temperature solid CO <sub>2</sub> adsorbents          | Solid amine-based adsorbents       | Silica as supporting materials          | 85         | 95% CO <sub>2</sub> , 5% N <sub>2</sub> , for 3 h                                                   | 3.28                             |      |
|                                                           |                                    | MOFs                                    | 40         | 15% CO <sub>2</sub> , 85% He, for 30 min                                                            | 4.06                             |      |
|                                                           |                                    | Clays                                   | 60         | 15% CO <sub>2</sub> , 3% O <sub>2</sub> , 10% H <sub>2</sub> O, and 2% Ar in N <sub>2</sub> balance | 4.05                             |      |
|                                                           |                                    | Polymers                                | 25         | Moist CO <sub>2</sub> /N <sub>2</sub> gas                                                           | 2.92                             |      |
|                                                           | Carbon-based adsorbents            | Tuning the textural properties          | 25         | 100% CO <sub>2</sub>                                                                                | 4.80                             |      |
|                                                           |                                    | Surface chemical modification           | 25         | 10% CO <sub>2</sub> , 90% Ar, for 60 min                                                            | 4.13                             |      |
|                                                           | Zeolite-based adsorbents           | Amines impregnation                     | 30         | 100% CO <sub>2</sub> , for 1 h                                                                      | 0.45                             |      |
|                                                           |                                    | Hybrid preparation materials            | 25         | 100% CO <sub>2</sub>                                                                                | 1.62                             |      |
|                                                           | MOF-based adsorbents               | Functional component integration        | 25         | 15% CO <sub>2</sub>                                                                                 | 1.63                             |      |
|                                                           | Alkali carbonates-based adsorbents | —                                       | 60         | 10% CO <sub>2</sub> , 10% H <sub>2</sub> O, 80% N <sub>2</sub>                                      | 3.1                              |      |
| Intermediate-temperature solid CO <sub>2</sub> adsorbents | LDH-based adsorbents               | Chemical composition tuning             | 200        | 100% CO <sub>2</sub> , for 2 h                                                                      | 1.25                             |      |
|                                                           |                                    | LDH-based composite                     | 200        | 100% CO <sub>2</sub> , for 2 h                                                                      | 0.47                             |      |
|                                                           |                                    | Doping with alkali metals               | 240        | 100% CO <sub>2</sub> , for 5 h                                                                      | 9.27                             |      |

|                                                 |                                    |                                                 |     |                                          |       |           |
|-------------------------------------------------|------------------------------------|-------------------------------------------------|-----|------------------------------------------|-------|-----------|
|                                                 | MgO-based adsorbents               | Mesoporous structure fabrication                | 300 | 100% CO <sub>2</sub> , for 4 h           | 1.22  |           |
|                                                 |                                    | Molten salts modification                       | 300 | 100% CO <sub>2</sub> , for 4 h           | 10.2  |           |
| High-temperature solid CO <sub>2</sub> sorbents | CaO-based sorbents                 | Preparation of CaO nanoparticles                | 700 | 100% CO <sub>2</sub> , for 30 min        | 17.18 |           |
|                                                 | Alkali silicate-based sorbents     | Molten salts modification                       | 650 | 100% CO <sub>2</sub> , for 2 h           | 8.25  |           |
|                                                 | Alkali titanate-based sorbents     | Binary alkali-metal titanate                    | 700 | 20–100% CO <sub>2</sub> , for 10 min     | 0.43  |           |
| Direct Air Carbon Capture                       | Solid amine-based (PEI) adsorbents | Com silica                                      | 25  | atmospheric CO <sub>2</sub> <sup>1</sup> | 2.36  | 18        |
|                                                 |                                    | Fumed silica                                    | 25  | atmospheric CO <sub>2</sub> <sup>1</sup> | 2.44  |           |
|                                                 |                                    | Mesocellular silica                             | 25  | atmospheric CO <sub>2</sub> <sup>1</sup> | 1.74  |           |
|                                                 |                                    | γ-Alumina                                       | 25  | atmospheric CO <sub>2</sub> <sup>1</sup> | 1.74  |           |
|                                                 |                                    | SBA-15 (75 wt% amine loading)                   | 25  | atmospheric CO <sub>2</sub> <sup>1</sup> | 1.90  |           |
|                                                 |                                    | MIL-101(Cr) (50 wt% amine loading)              | 25  | atmospheric CO <sub>2</sub> <sup>1</sup> | 1.81  |           |
| Direct Air Carbon Capture (Peroxide)            | Tetraperoxo-metalates              | K <sub>3</sub> V(O <sub>2</sub> ) <sub>4</sub>  | 25  | atmospheric CO <sub>2</sub> <sup>1</sup> | 4.93  | This Work |
|                                                 |                                    | Rb <sub>3</sub> V(O <sub>2</sub> ) <sub>4</sub> | 25  | atmospheric CO <sub>2</sub> <sup>1</sup> | 4.41  |           |
|                                                 |                                    | Cs <sub>3</sub> V(O <sub>2</sub> ) <sub>4</sub> | 25  | atmospheric CO <sub>2</sub> <sup>1</sup> | 2.70  |           |

<sup>1</sup>approximately 400 ppm



## References

1. P. Hohenberg and W. Kohn, Inhomogeneous Electron Gas. *Physical Review*, 136, B864. *Journal*, 1964.
2. W. Kohn and L. J. Sham, Self-consistent equations including exchange and correlation effects, *Phys. Rev.*, 1965, **140**, A1133.
3. S. Clark, M. Segall, C. Pickard, P. Hasnip, M. Probert, K. Refson and M. C. Payne, First Principles Methods Using CASTEP, *Z. Kristallogr. Cryst. Mater.*, 2005, **220**, 567.
4. J. P. Perdew, K. Burke and M. Ernzerhof, Generalized Gradient Approximation Made Simple, *Phys. Rev. Lett.*, 1996, **77**, 3865-3868.
5. B. G. Pfrommer, M. Côté, S. G. Louie and M. L. Cohen, Relaxation of Crystals with the Quasi-Newton Method, *J. Comput. Phys.*, 1997, **131**, 233-240.
6. H. J. Monkhorst and J. D. Pack, Special points for Brillouin-zone integrations, *Phys. Rev. B*, 1976, **13**, 5188-5192.
7. K. Refson, P. R. Tulip and S. J. Clark, Variational density-functional perturbation theory for dielectrics and lattice dynamics, *Phys. Rev. B*, 2006, **73**, 155114.
8. A. Jain, S. P. Ong, G. Hautier, W. Chen, W. D. Richards, S. Dacek, S. Cholia, D. Gunter, D. Skinner, G. Ceder and K. A. Persson, Commentary: The Materials Project: A materials genome approach to accelerating materials innovation, *APL Mater.*, 2013, **1**.
9. Jmol: an open-source Java viewer for chemical structures in 3D. <http://www.jmol.org/>.
10. G. W. T. M. J. Frisch, H. B. Schlegel, G. E. Scuseria, M. A. Robb, J. R. Cheeseman, G. Scalmani, V. Barone, G. A. Petersson, H. Nakatsuji, X. Li, M. Caricato, A. V. Marenich, J. Bloino, B. G. Janesko, R. Gomperts, B. Mennucci, H. P. Hratchian, J. V. Ortiz, A. F. Izmaylov, J. L. Sonnenberg, D. Williams-Young, F. Ding, F. Lipparini, F. Egidi, J. Goings, B. Peng, A. Petrone, T. Henderson, D. Ranasinghe, V. G. Zakrzewski, J. Gao, N. Rega, G. Zheng, W. Liang, M. Hada, M. Ehara, K. Toyota, R. Fukuda, J. Hasegawa, M. Ishida, T. Nakajima, Y. Honda, O. Kitao, H. Nakai, T. Vreven, K. Throssell, J. A. Montgomery, Jr., J. E. Peralta, F. Ogliaro, M. J. Bearpark, J. J. Heyd, E. N. Brothers, K. N. Kudin, V. N. Staroverov, T. A. Keith, R. Kobayashi, J. Normand, K. Raghavachari, A. P. Rendell, J. C. Burant, S. S. Iyengar, J. Tomasi, M. Cossi, J. M. Millam, M. Klene, C. Adamo, R. Cammi, J. W. Ochterski, R. L. Martin, K. Morokuma, O. Farkas, J. B. Foresman, and D. J. Fox, Gaussian 16, Revision A. 03, Gaussian, Inc., Wallingford CT, 2016, **3**.
11. T. Yanai, D. P. Tew and N. C. Handy, A new hybrid exchange–correlation functional using the Coulomb-attenuating method (CAM-B3LYP), *Chem. Phys. Lett.*, 2004, **393**, 51-57.
12. W. R. Wadt and P. J. Hay, Ab initio effective core potentials for molecular calculations. Potentials for main group elements Na to Bi, *Chem. Phys.*, 1985, **82**, 284-298.

13. I. Bytheway and M. W. Wong, The prediction of vibrational frequencies of inorganic molecules using density functional theory, *Chem. Phys. Lett.*, 1998, **282**, 219-226.
14. B. H. Solis, Y. Cui, X. Weng, J. Seifert, S. Schauer mann, J. Sauer, S. Shaikhutdinov and H.-J. Freund, Initial stages of CO<sub>2</sub> adsorption on CaO: a combined experimental and computational study, *PCCP*, 2017, **19**, 4231-4242.
15. R. Stomberg, The crystal structure of potassium carbonatooxidiperoxovanadate (V), K<sub>3</sub>[VO(O<sub>2</sub>)<sub>2</sub>(CO<sub>3</sub>)], *Acta Chem. Scand. A*, 1985, **39**, 725-731.
16. D. Wang, J. Zou, H. Cai, Y. Huang, F. Li and Q. Cheng, Effective degradation of Orange G and Rhodamine B by alkali-activated hydrogen peroxide: roles of HO<sub>2</sub><sup>-</sup> and O<sub>2</sub><sup>·-</sup>, *Environmental Science and Pollution Research*, 2019, **26**, 1445-1454.
17. W. Gao, S. Liang, R. Wang, Q. Jiang, Y. Zhang, Q. Zheng, B. Xie, C. Y. Toe, X. Zhu, J. Wang, L. Huang, Y. Gao, Z. Wang, C. Jo, Q. Wang, L. Wang, Y. Liu, B. Louis, J. Scott, A.-C. Roger, R. Amal, H. He and S.-E. Park, Industrial carbon dioxide capture and utilization: state of the art and future challenges, *Chem. Soc. Rev.*, 2020, **49**, 8584-8686.
18. D. Panda, V. Kulkarni, S. K. Singh and Engineering, Evaluation of amine-based solid adsorbents for direct air capture: a critical review, *React. Chem. Eng.*, 2023, **8**, 10-40.
